# Supplementary material for: Sesquiterpenoids from Inula britannica and Their Potential Effects against Triple-Negative Breast Cancer Cells
Source: MDPI journal article supplement (doi:10.3390/molecules27165230), 2022-08-16

## *Supplementary Materials*

### **Sesquiterpenoids from *Inula britannica* and Their Potential Effects against Triple Negative Breast Cancer Cells**

**Ruo-Yu Qi, Cong Guo, Xiao-Na Peng and Jiang-Jiang Tang \***

Shaanxi Key Laboratory of Natural Products & Chemical Biology, College of Chemistry & Pharmacy,  
Northwest A&F University, Taicheng Road, Yangling 712100, China

\* Correspondence: tangjiang11@nwfau.edu.cn (J.-J.T.); Tel.: +86-298-709-2335

**Table S1.** Crystal data and structure refinement for **4**.

|                                             |                                                                |
|---------------------------------------------|----------------------------------------------------------------|
| Identification code                         | <b>4</b>                                                       |
| Empirical formula                           | C <sub>15</sub> H <sub>20</sub> O <sub>4</sub>                 |
| Formula weight                              | 264.31                                                         |
| Temperature/K                               | 149.96(10)                                                     |
| Crystal system                              | orthorhombic                                                   |
| Space group                                 | P2 <sub>1</sub> 2 <sub>1</sub> 2 <sub>1</sub>                  |
| a/Å                                         | 9.55914(9)                                                     |
| b/Å                                         | 10.00802(10)                                                   |
| c/Å                                         | 13.83442(15)                                                   |
| $\alpha$ /°                                 | 90                                                             |
| $\beta$ /°                                  | 90                                                             |
| $\gamma$ /°                                 | 90                                                             |
| Volume/Å <sup>3</sup>                       | 1323.51(2)                                                     |
| Z                                           | 4                                                              |
| $\rho_{\text{calc}}$ /cm <sup>3</sup>       | 1.326                                                          |
| $\mu$ /mm <sup>-1</sup>                     | 0.779                                                          |
| F(000)                                      | 568.0                                                          |
| Crystal size/mm <sup>3</sup>                | 0.22 × 0.16 × 0.05                                             |
| Radiation                                   | Cu K $\alpha$ ( $\lambda$ = 1.54184)                           |
| 2 $\Theta$ range for data collection/°      | 10.912 to 154.8                                                |
| Index ranges                                | -9 ≤ h ≤ 11, -12 ≤ k ≤ 12, -17 ≤ l ≤ 16                        |
| Reflections collected                       | 7356                                                           |
| Independent reflections                     | 2626 [ $R_{\text{int}}$ = 0.0173, $R_{\text{sigma}}$ = 0.0153] |
| Data/restraints/parameters                  | 2626/0/183                                                     |
| Goodness-of-fit on F <sup>2</sup>           | 1.010                                                          |
| Final R indexes [ $I \geq 2\sigma(I)$ ]     | $R_1$ = 0.0301, $wR_2$ = 0.1041                                |
| Final R indexes [all data]                  | $R_1$ = 0.0303, $wR_2$ = 0.1044                                |
| Largest diff. peak/hole / e Å <sup>-3</sup> | 0.19/-0.17                                                     |
| Flack parameter                             | -0.04(5)                                                       |

**Spectral data for isolates 1–8:**

**Figure S1.**  $^1\text{H}$ ,  $^{13}\text{C}$  NMR, HSQC, HMBC and  $^1\text{H}$ - $^1\text{H}$  COSY ( $\text{CDCl}_3$ ) spectra of **1**.

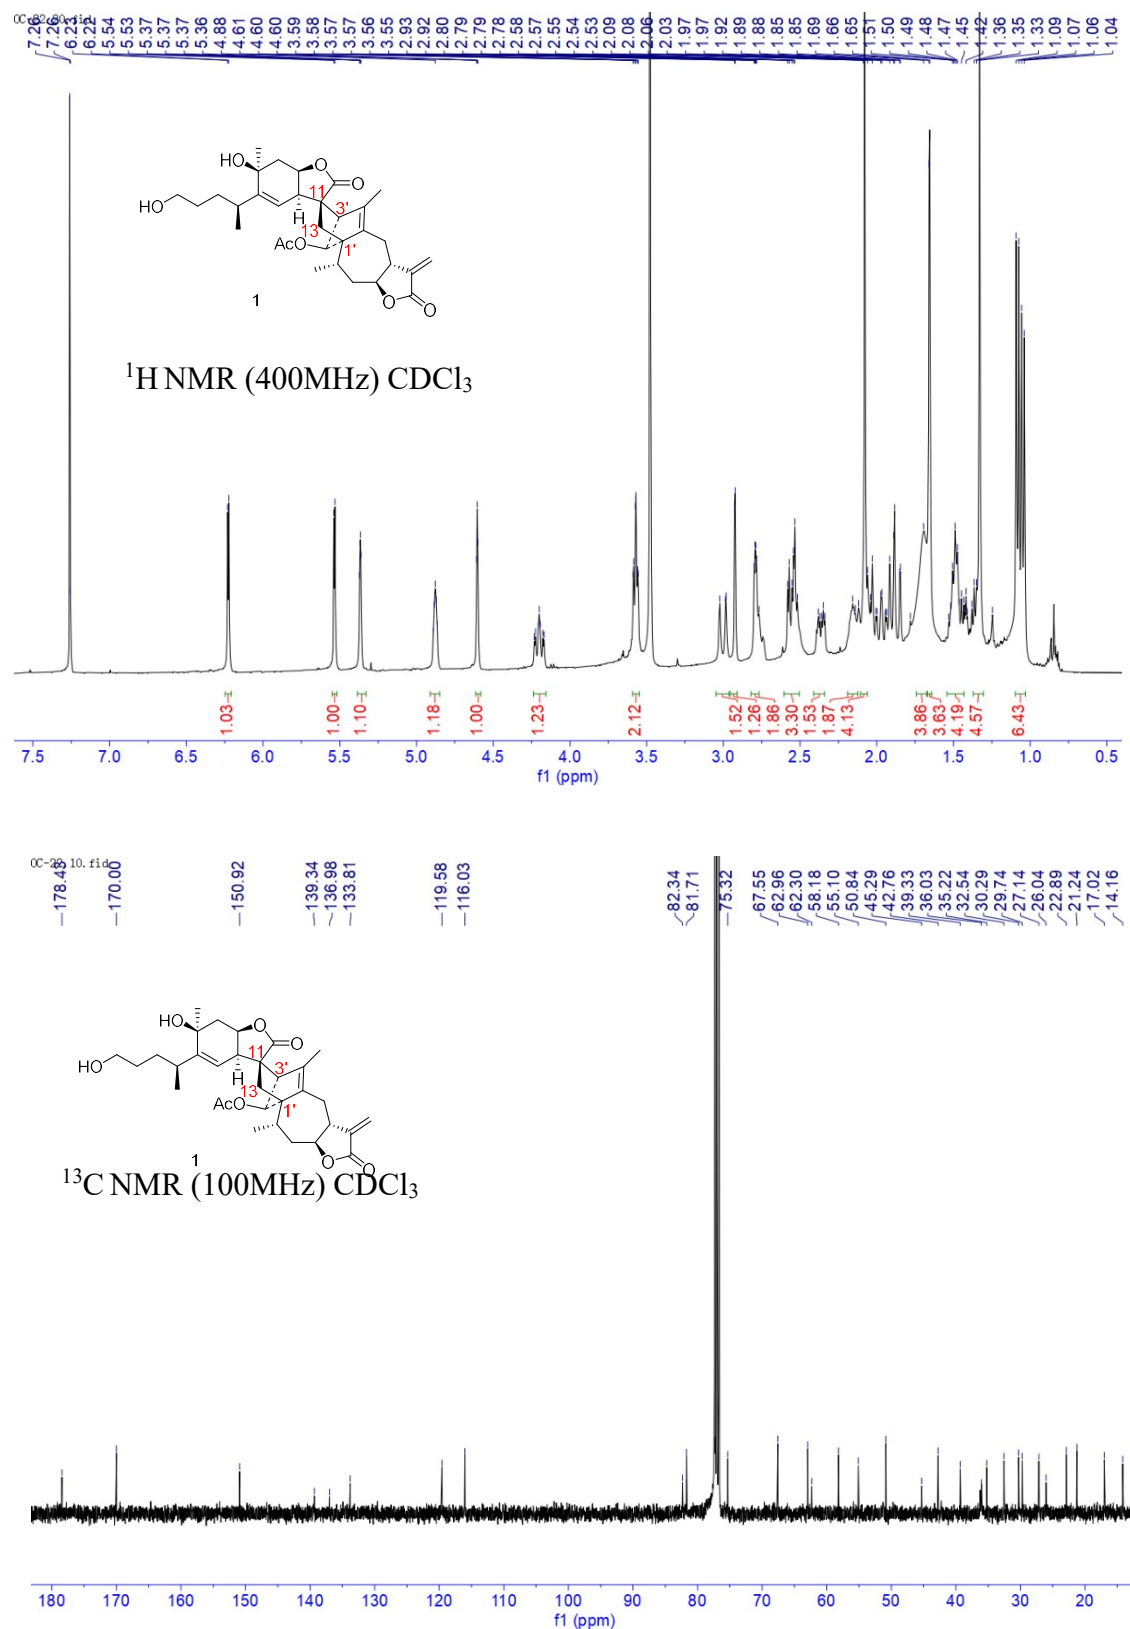

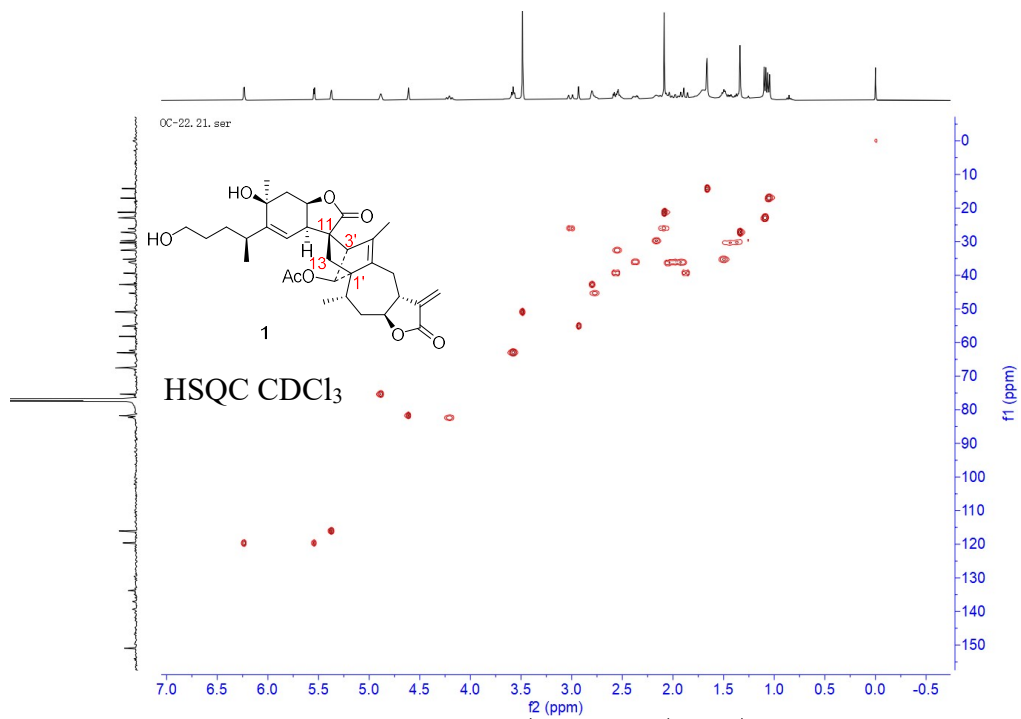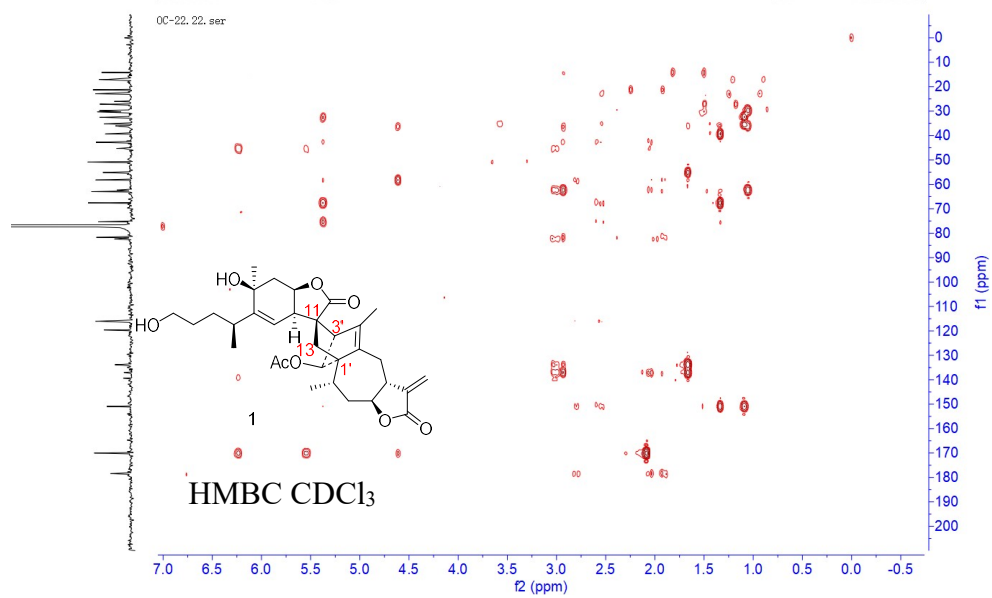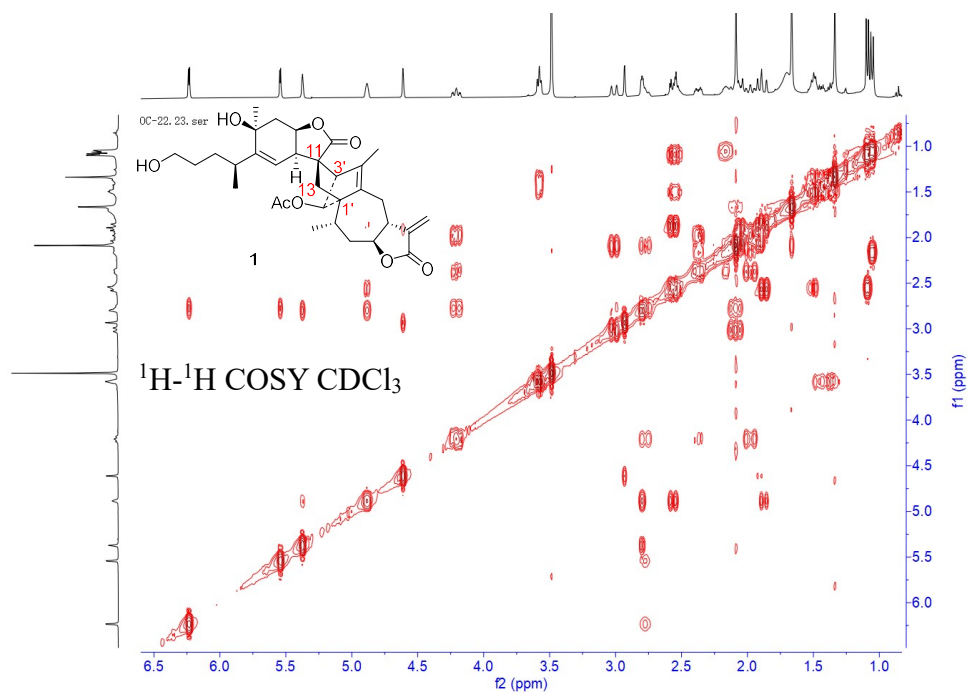

**Figure S2.**  $^1\text{H}$ ,  $^{13}\text{C}$ , DEPT, HSQC and  $^1\text{H}$ - $^1\text{H}$  COSY NMR ( $\text{CDCl}_3$ ) spectra of **2**.

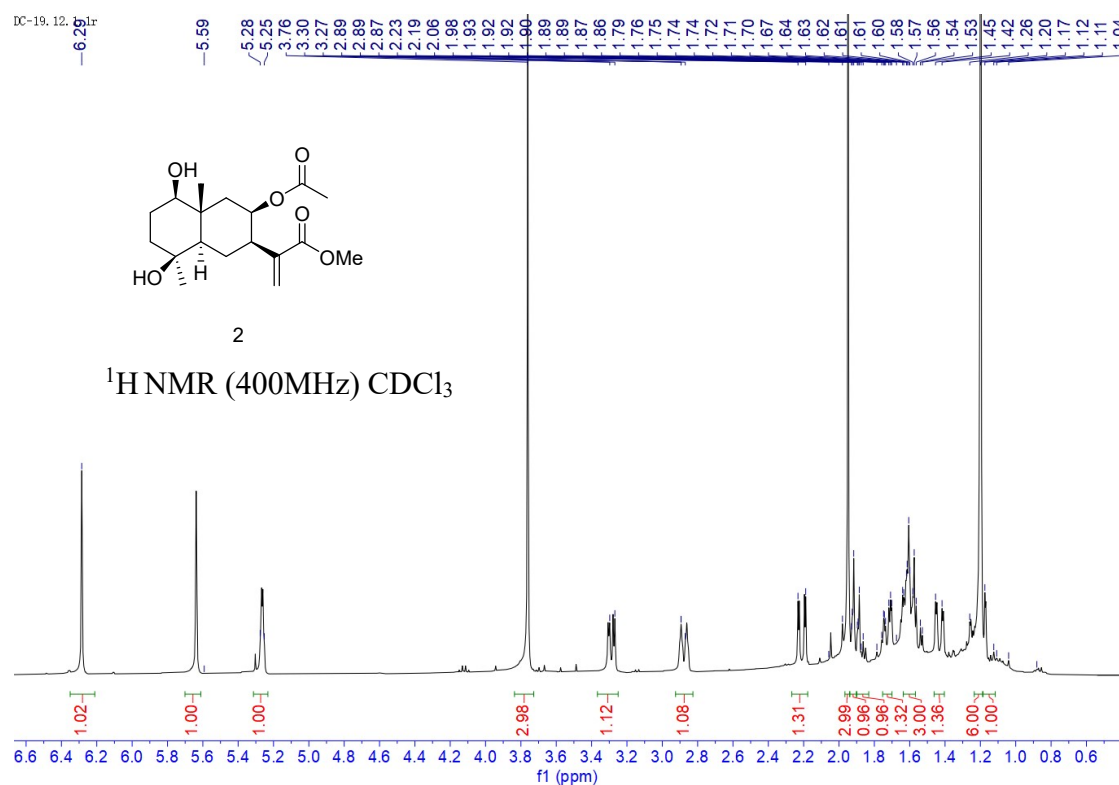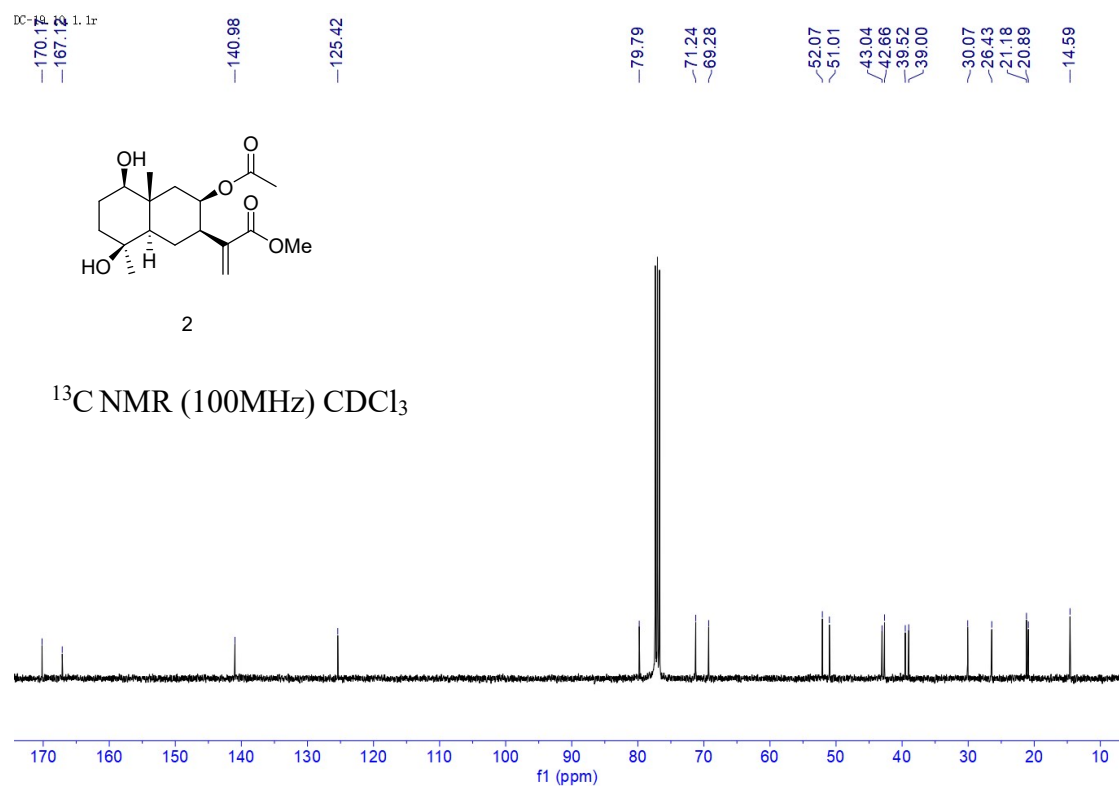

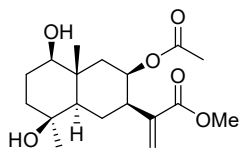

2

DEPT (135) CDCl<sub>3</sub>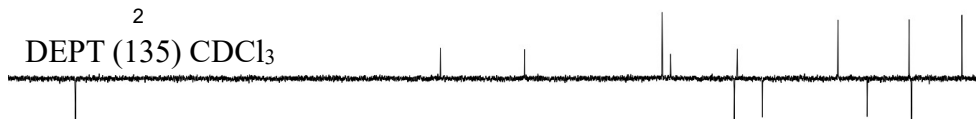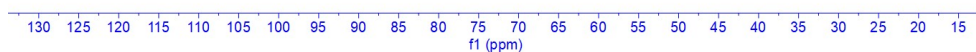

DC-19.14.ser

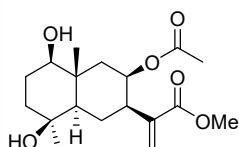

2

HSQC CDCl<sub>3</sub>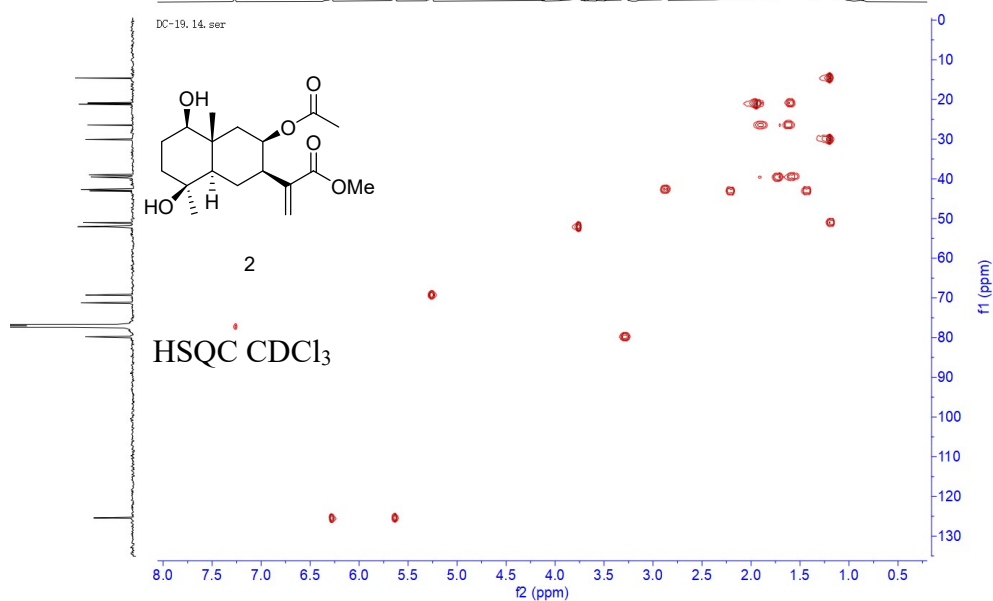

DC-19.13.ser

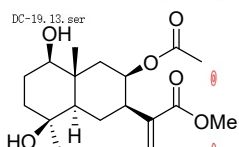

2

<sup>1</sup>H-<sup>1</sup>H COSY CDCl<sub>3</sub>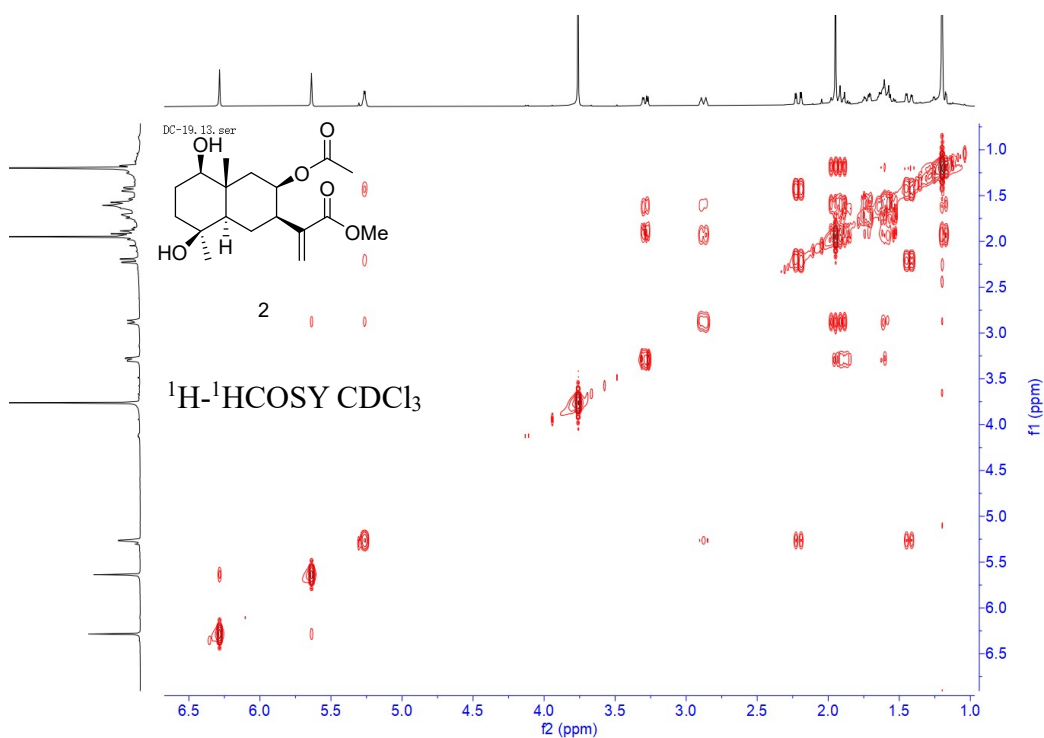

**Figure S3.**  $^1\text{H}$ ,  $^{13}\text{C}$ , DEPT, HSQC and HMBC NMR (MeOD) spectra of **3**

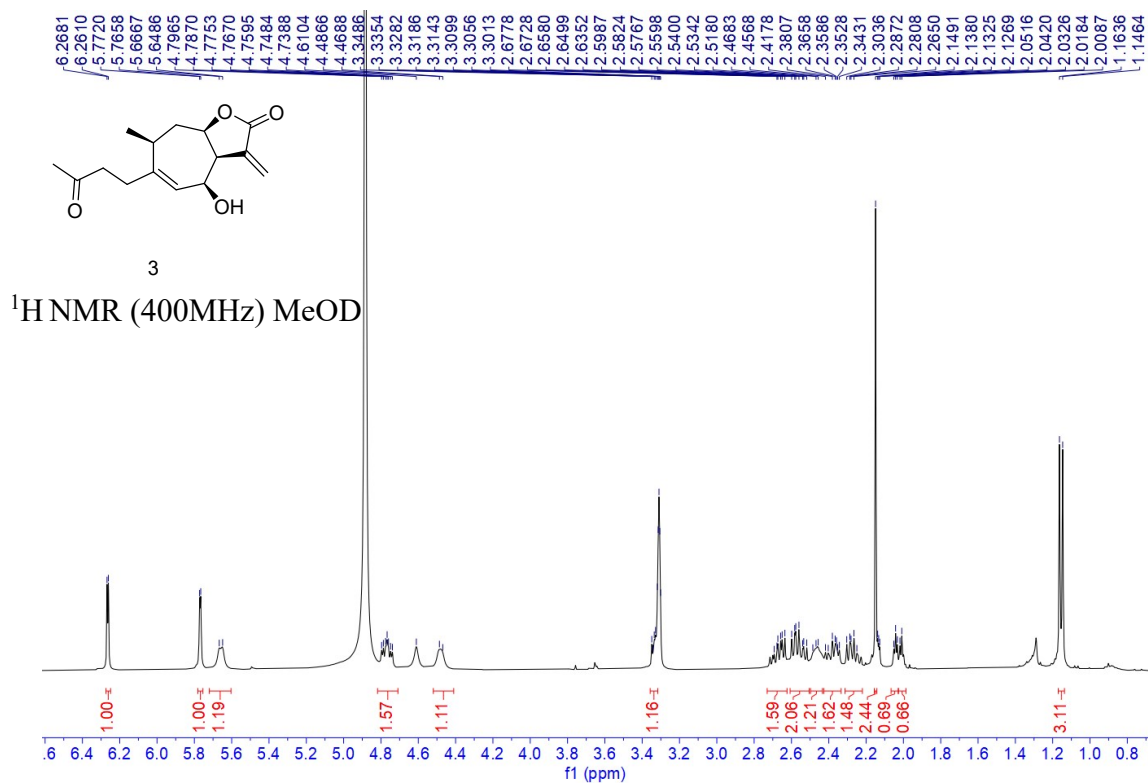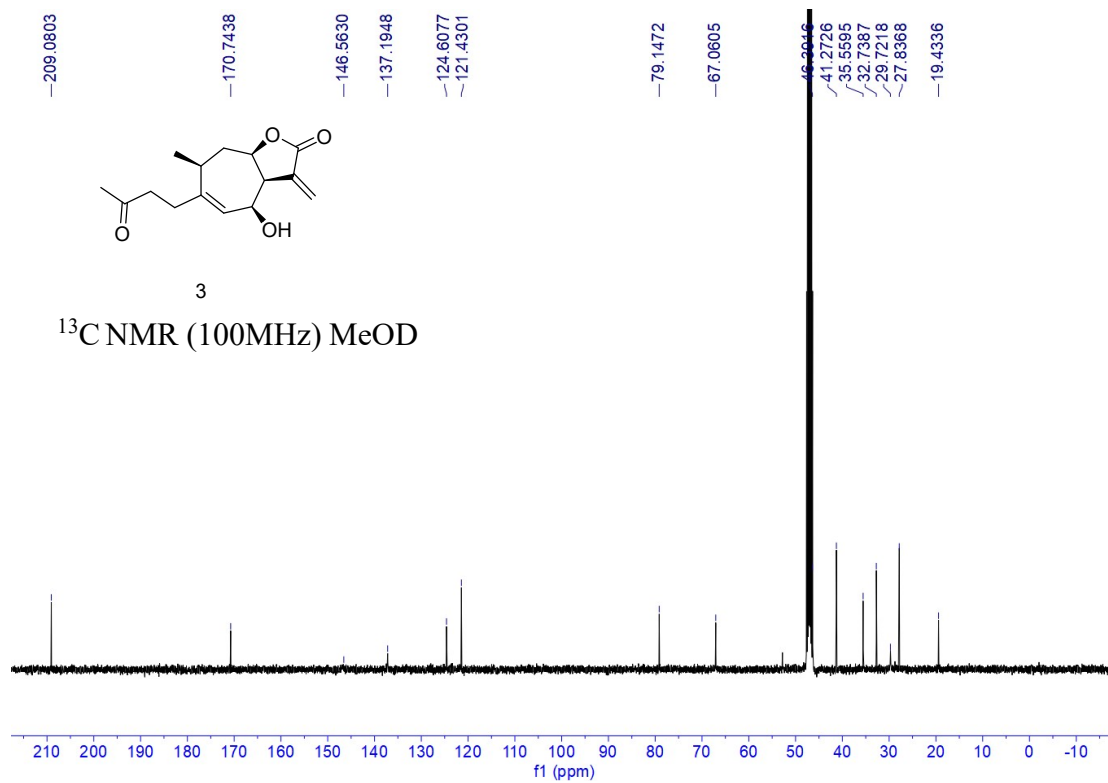

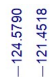

DEPT (135) MeOD

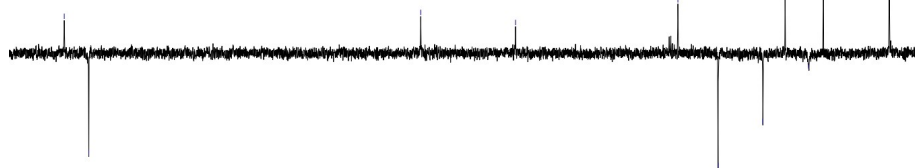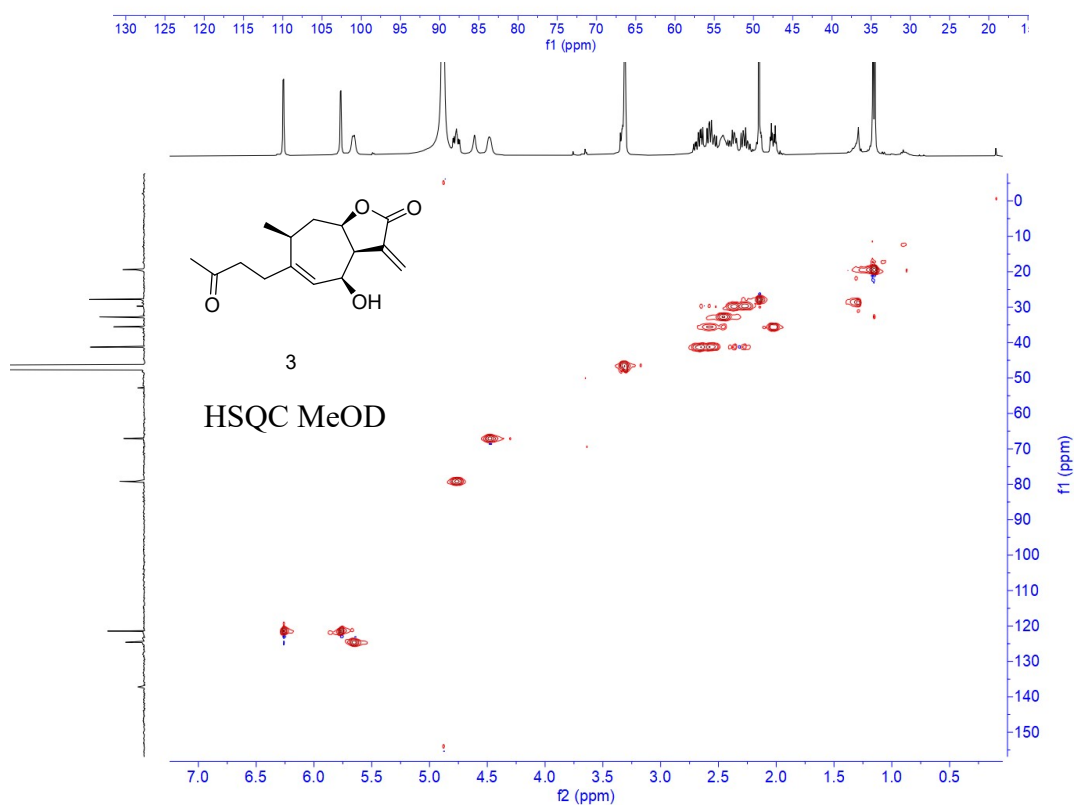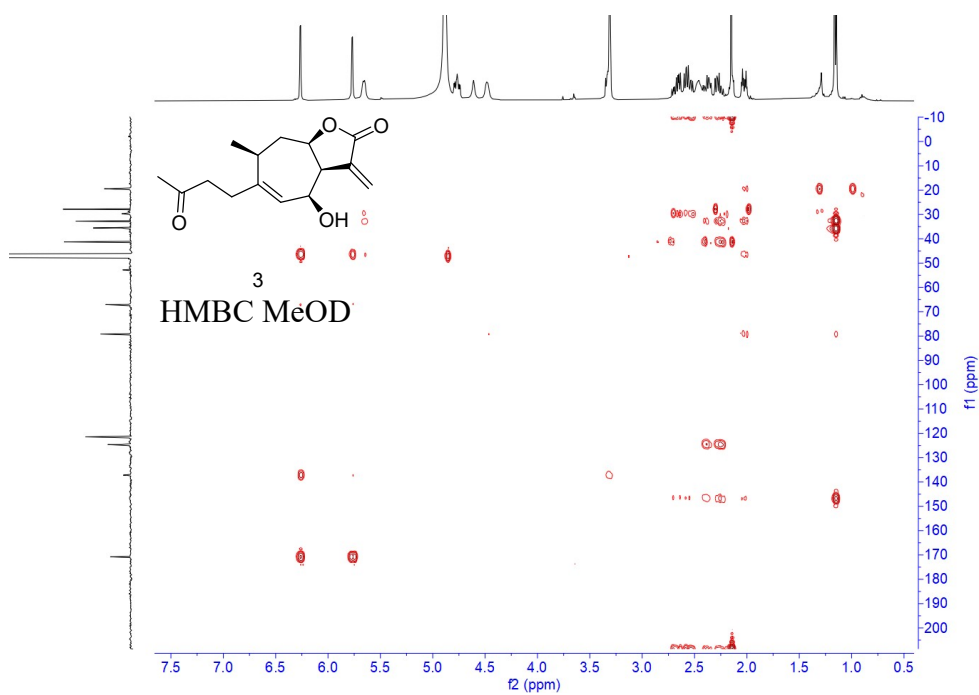



**Figure S4.**  $^1\text{H}$ ,  $^{13}\text{C}$ , DEPT, HSQC, HMBC and  $^1\text{H}$ - $^1\text{H}$  COSY ( $\text{CDCl}_3$ ) spectra of **4**

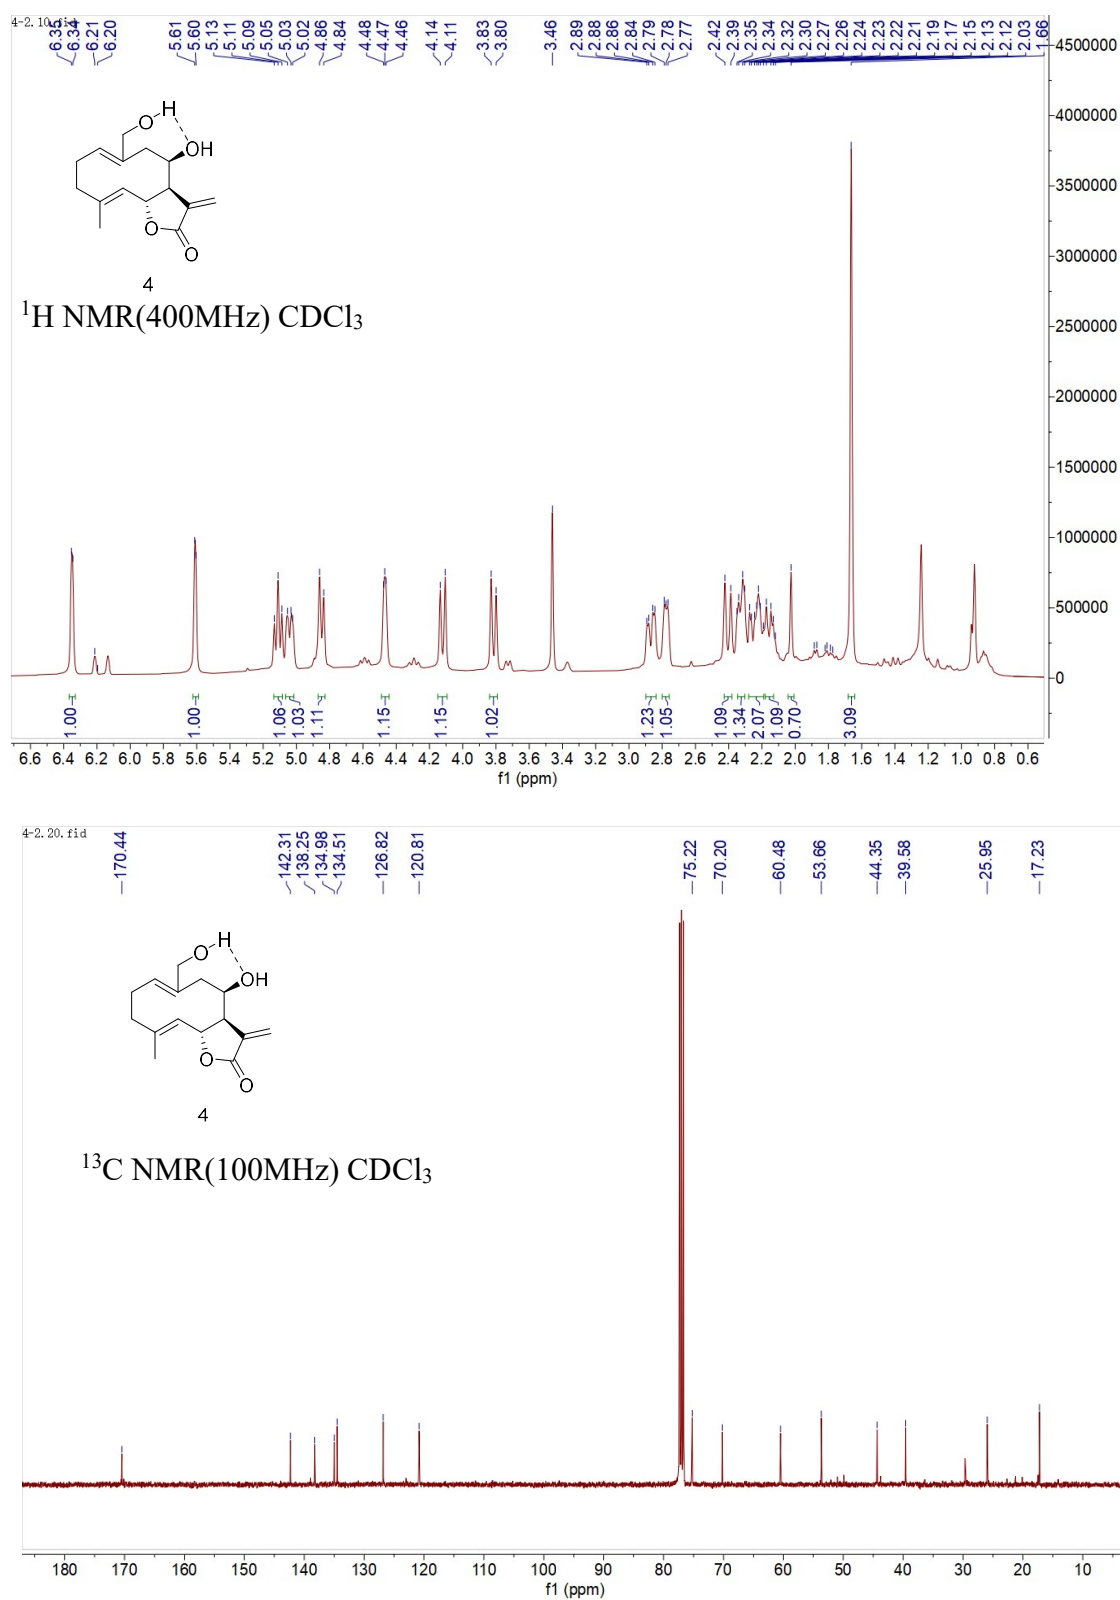

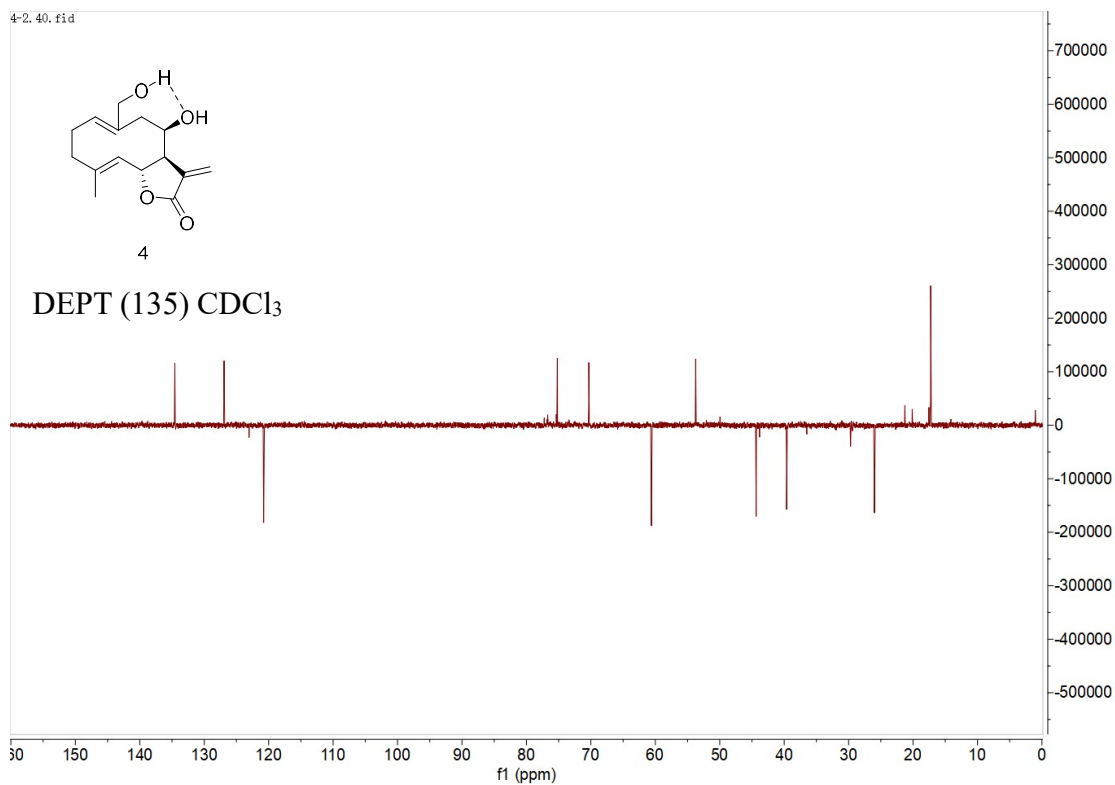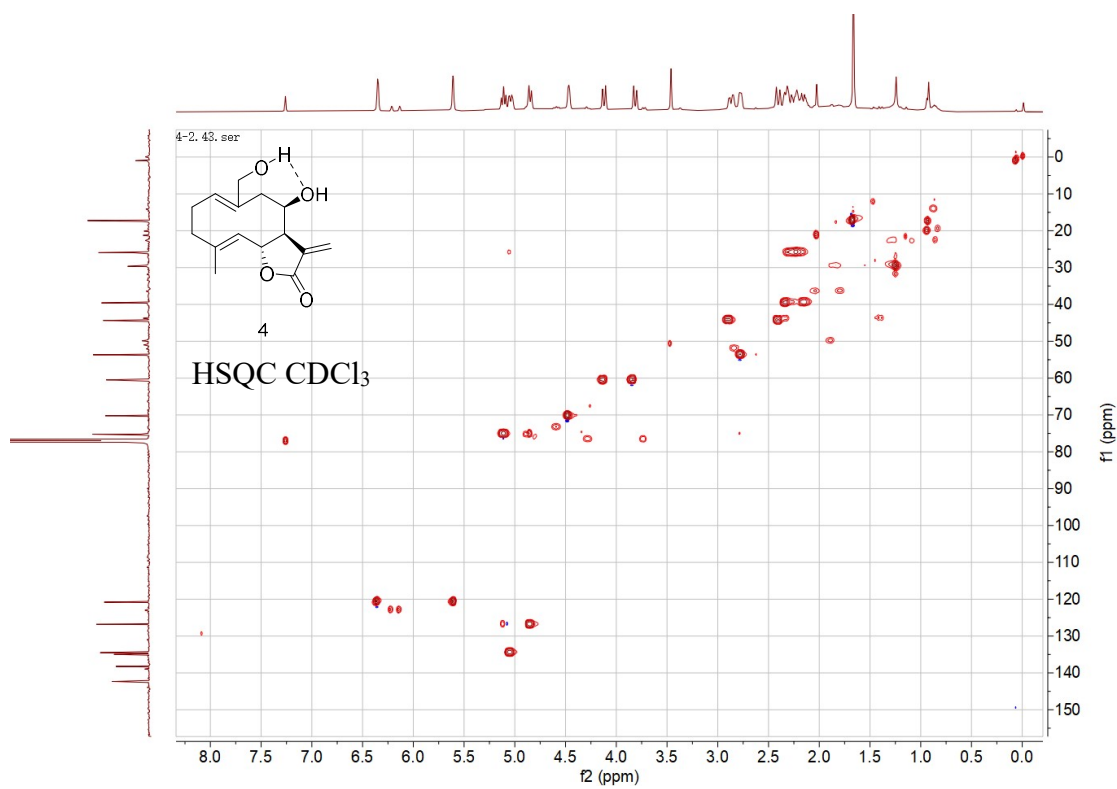

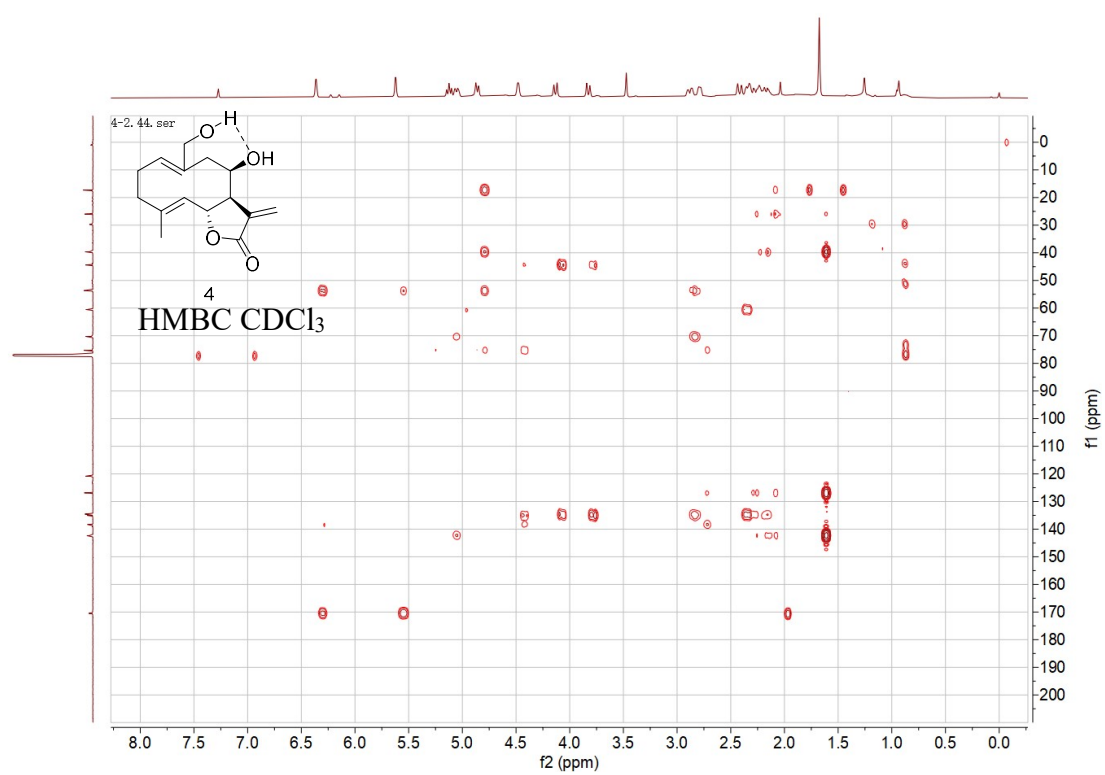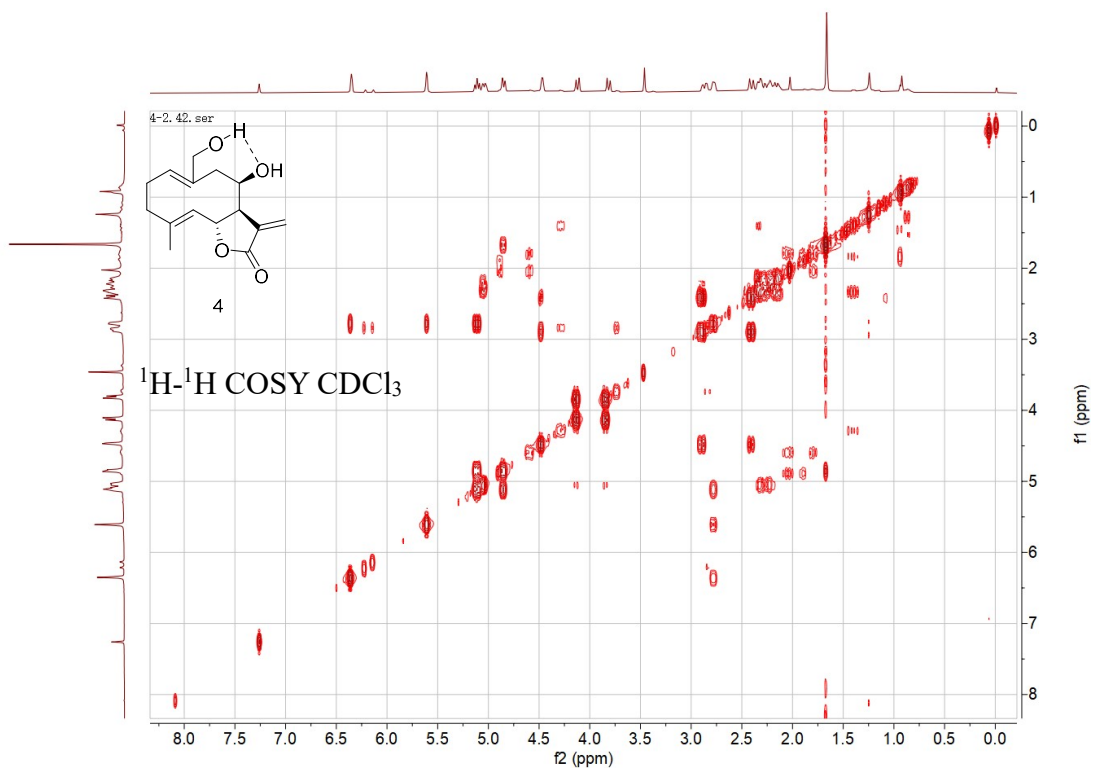

**Figure S5.**  $^1\text{H}$ ,  $^{13}\text{C}$ , HSQC, HMBC and  $^1\text{H}$ - $^1\text{H}$  COSY NMR (MeOD) spectra of **5**

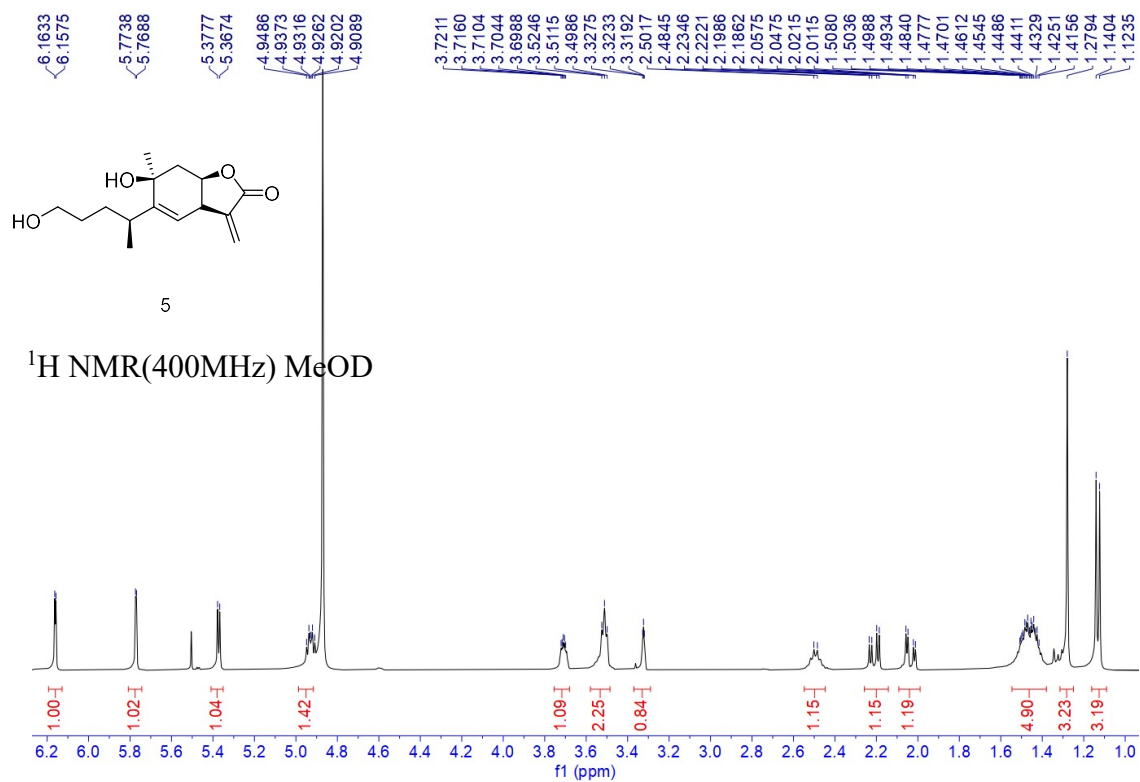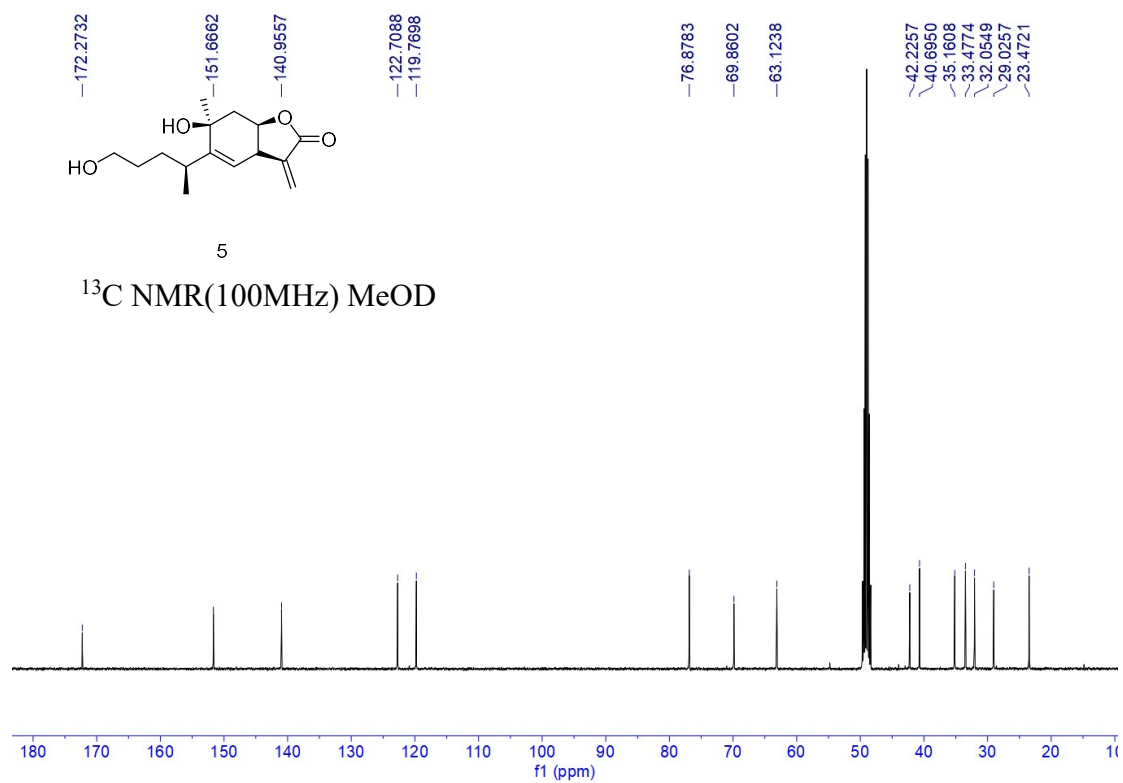

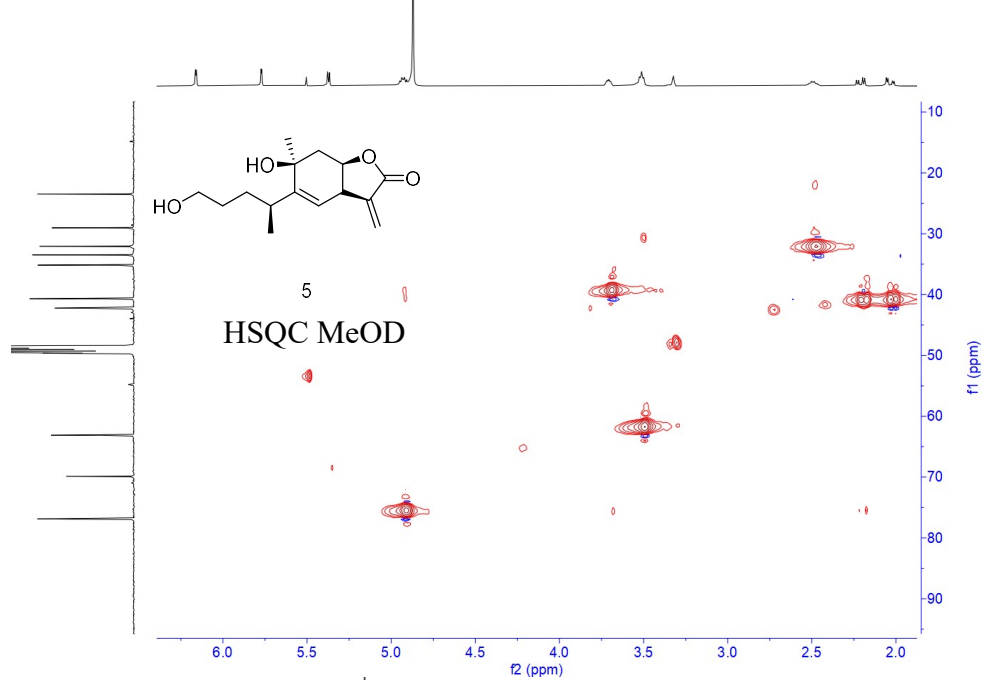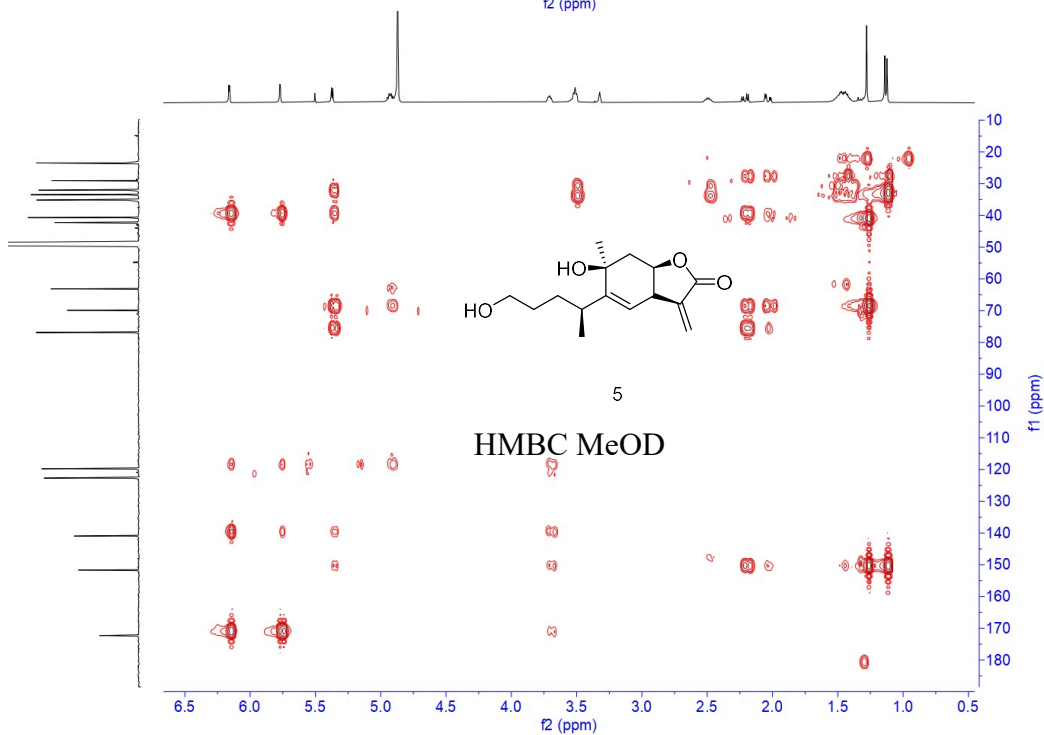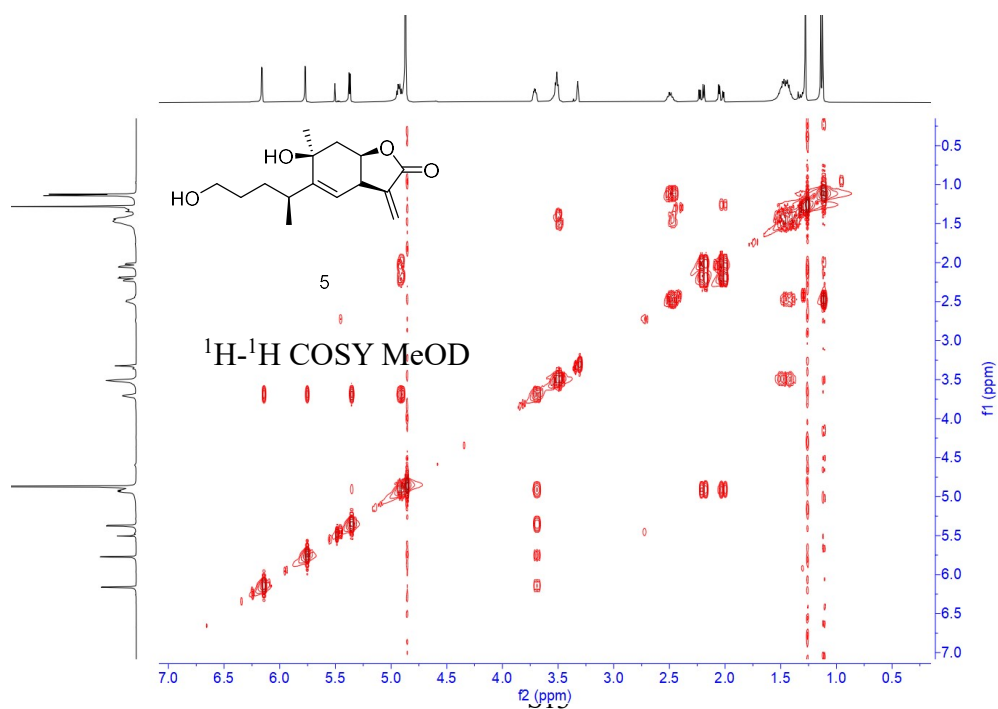

**Figure S6.**  $^1\text{H}$ ,  $^{13}\text{C}$ , HSQC, HMBC,  $^1\text{H}$ - $^1\text{H}$  COSY and NOE (MeOD) spectra of **6**

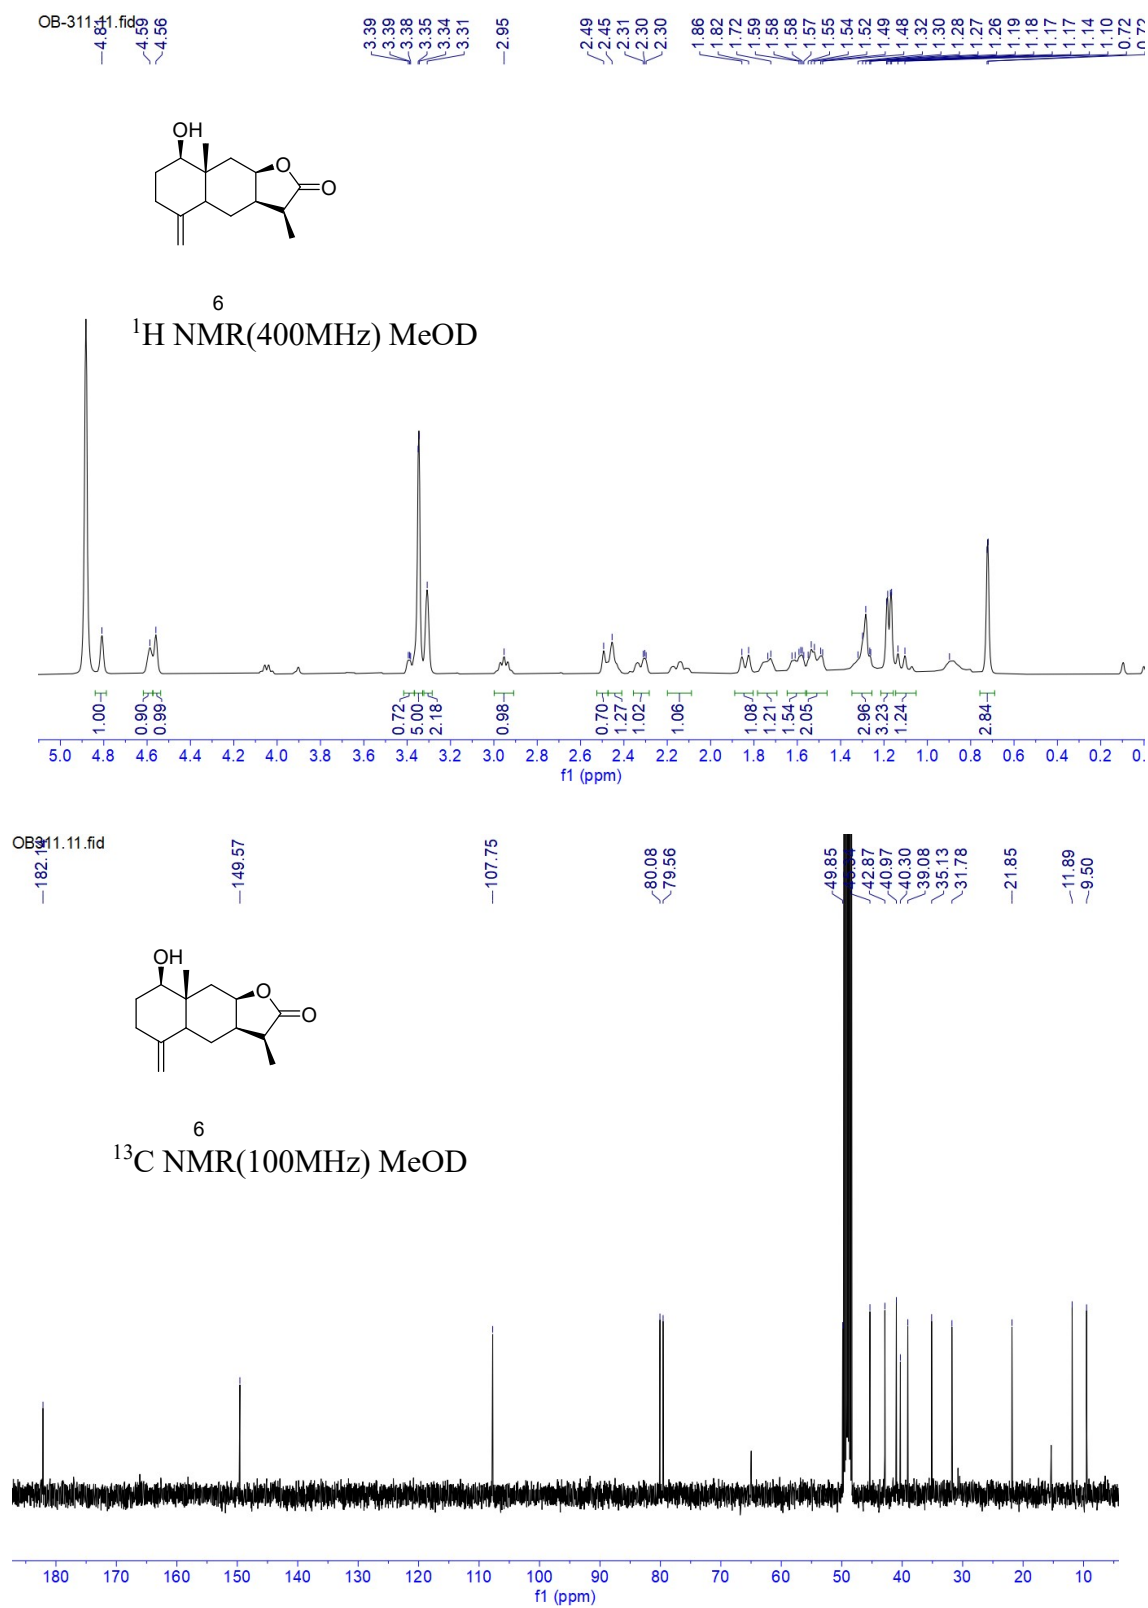

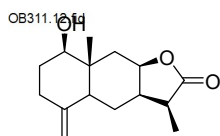

80.07  
79.55

49.85  
45.33  
42.87  
40.96  
39.07  
35.13  
31.78

21.84

11.89  
9.50

6

DEPT (135) MeOD

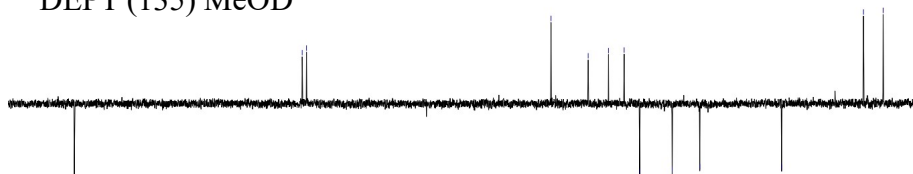

115 110 105 100 95 90 85 80 75 70 65 60 55 50 45 40 35 30 25 20 15 10

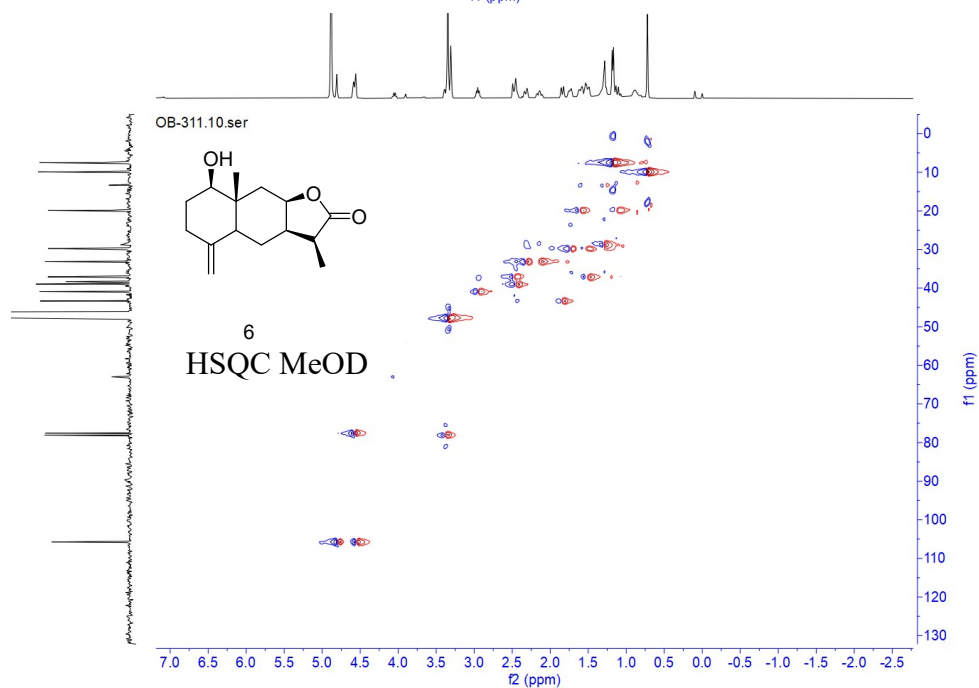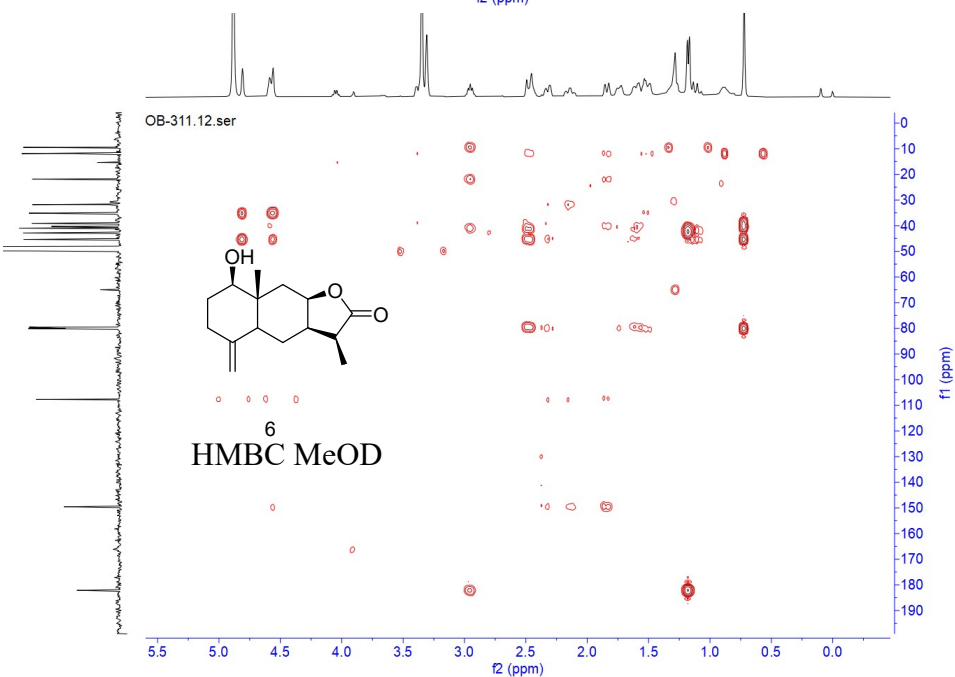

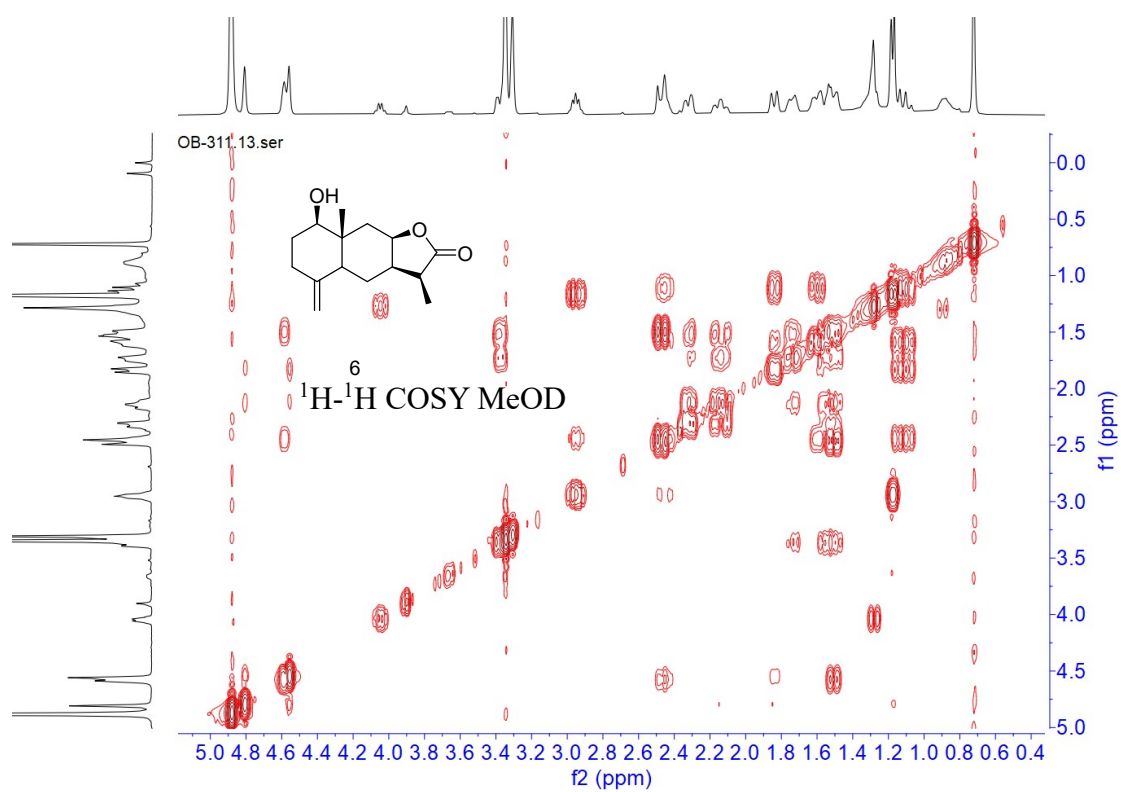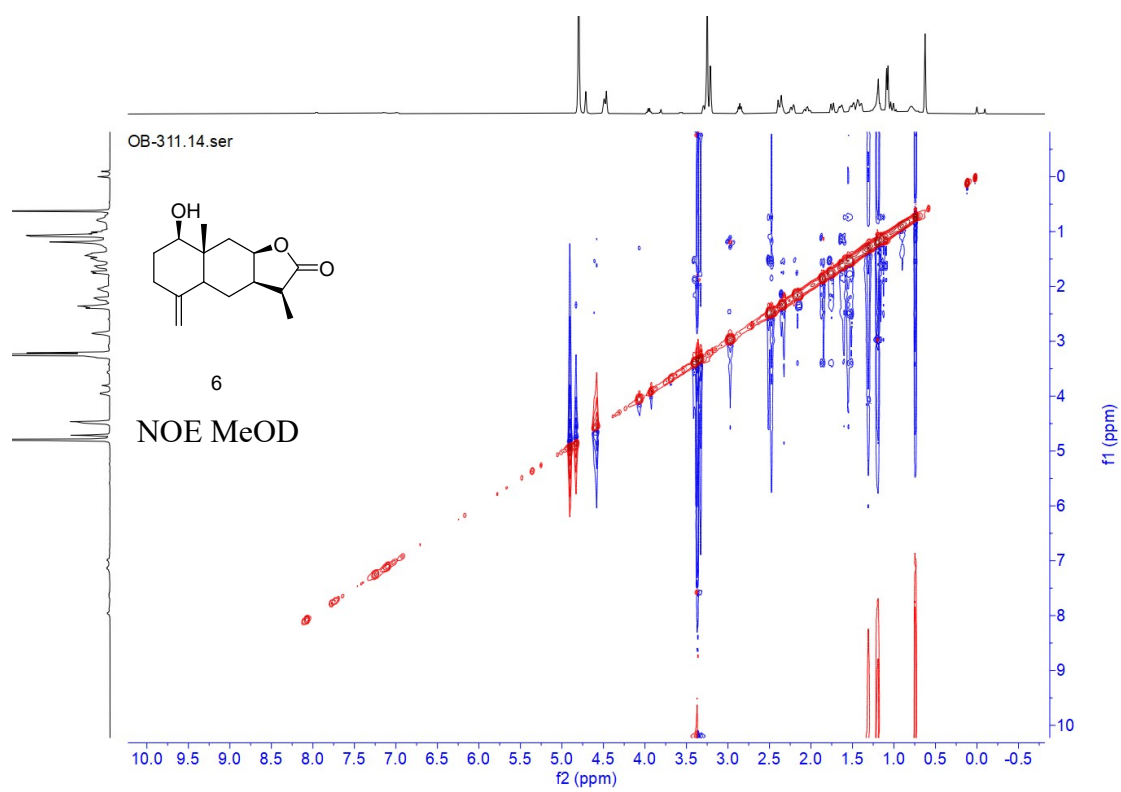



**Figure S7.**  $^1\text{H}$ ,  $^{13}\text{C}$ , HSQC, HMBC and  $^1\text{H}$ - $^1\text{H}$  COSY NMR ( $\text{CDCl}_3$ ) spectra of **7**

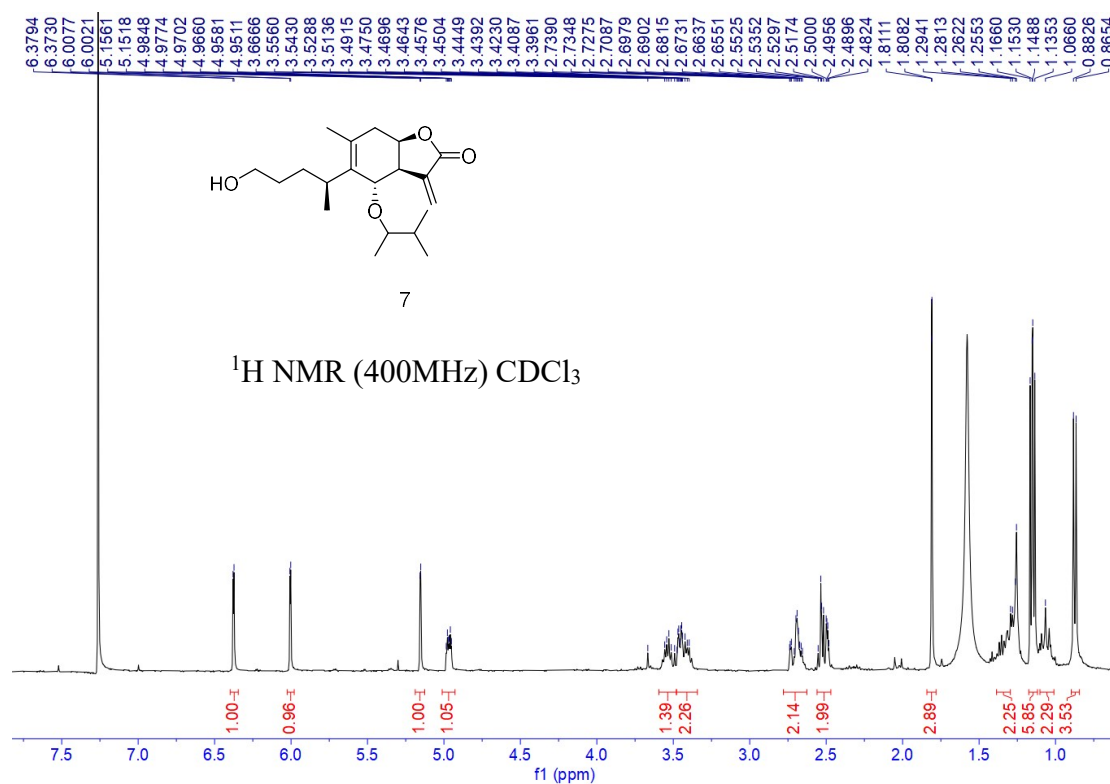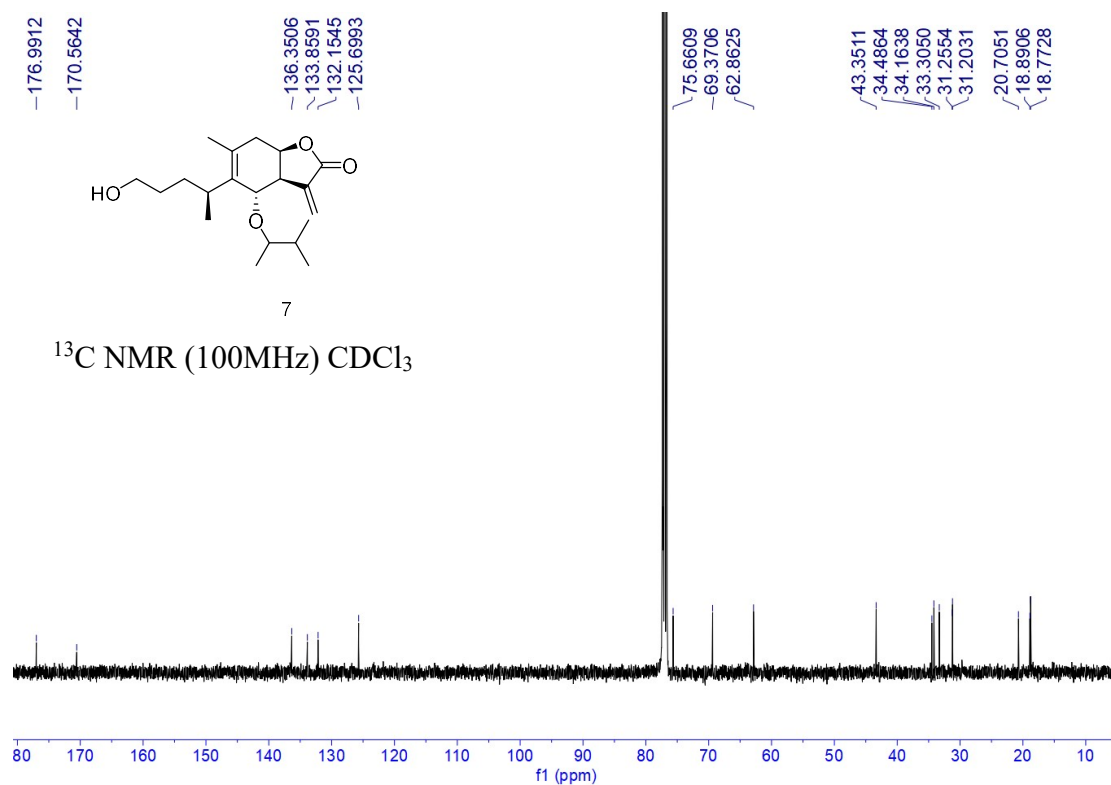

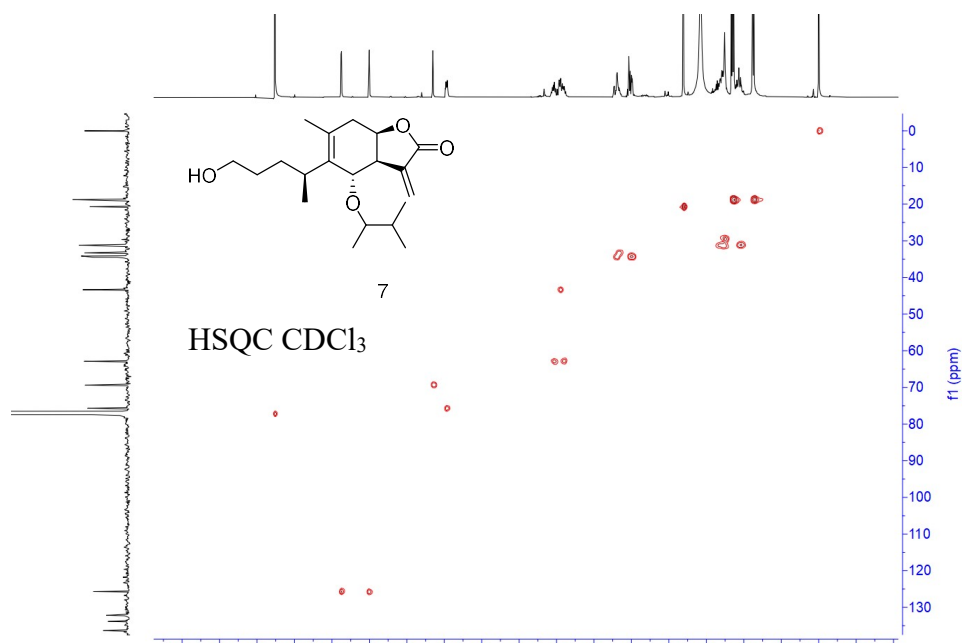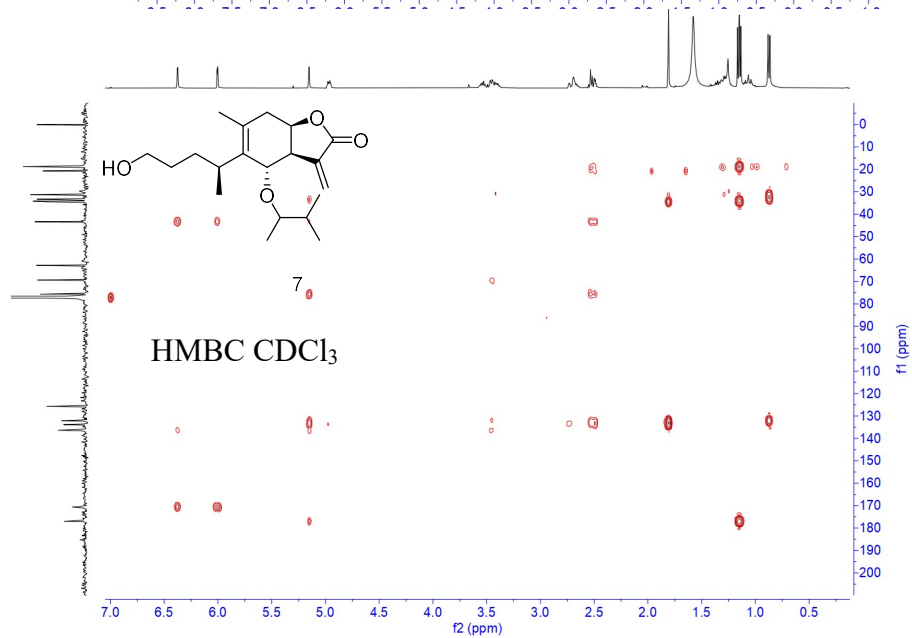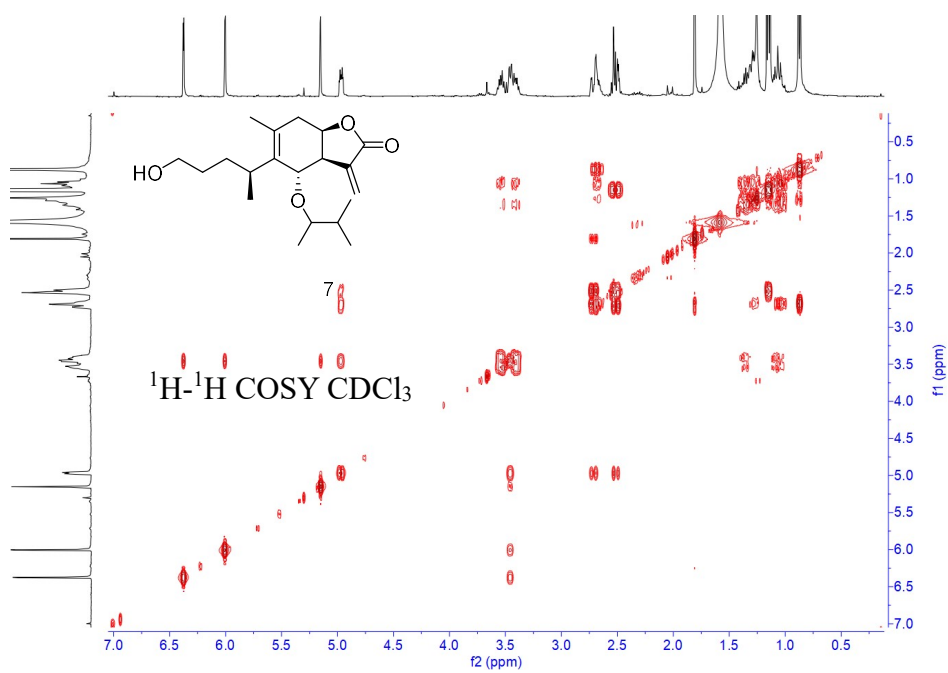

**FigureS8.**  $^1\text{H}$ ,  $^{13}\text{C}$ , HSQC, HMBC and  $^1\text{H}$ - $^1\text{H}$  COSY NMR (MeOD) spectra of **8**

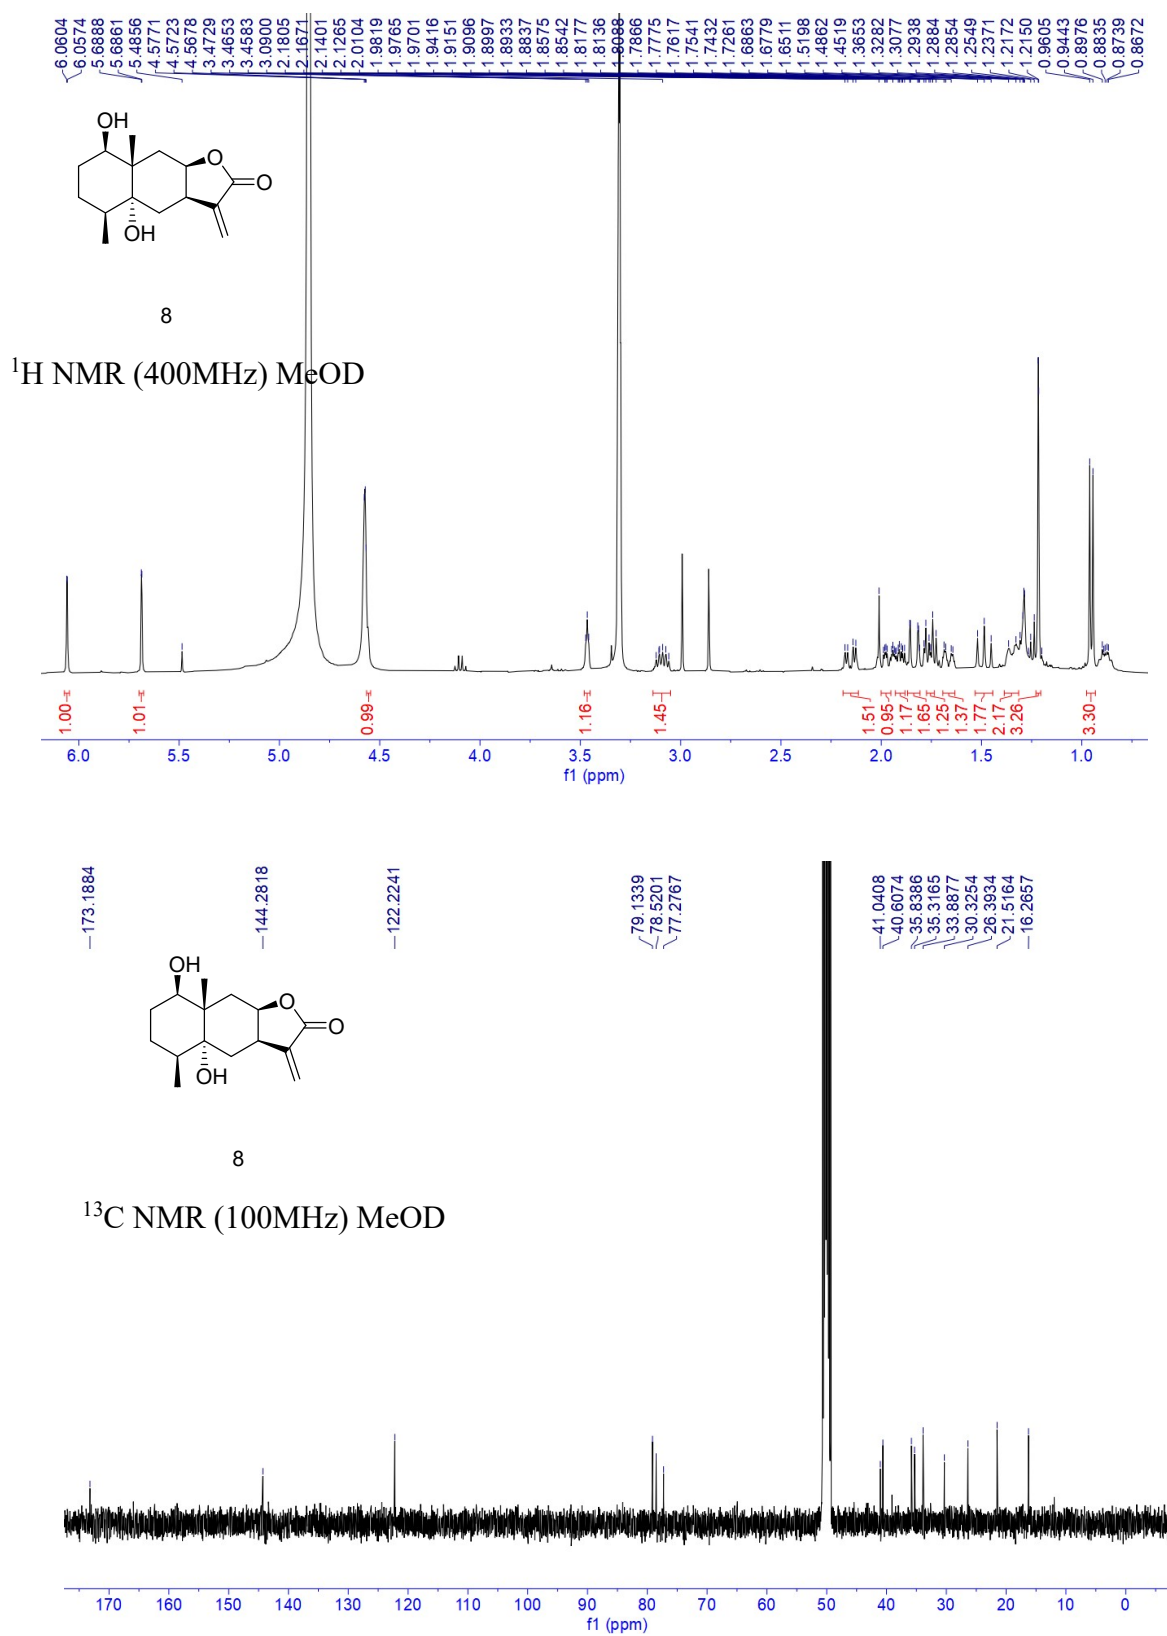

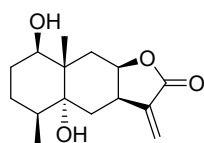

8

DEPT (135) MeOD

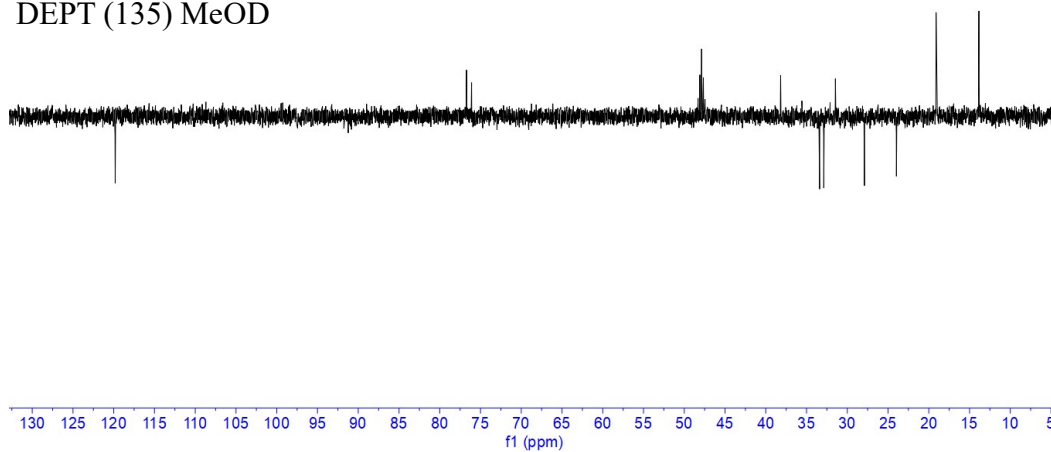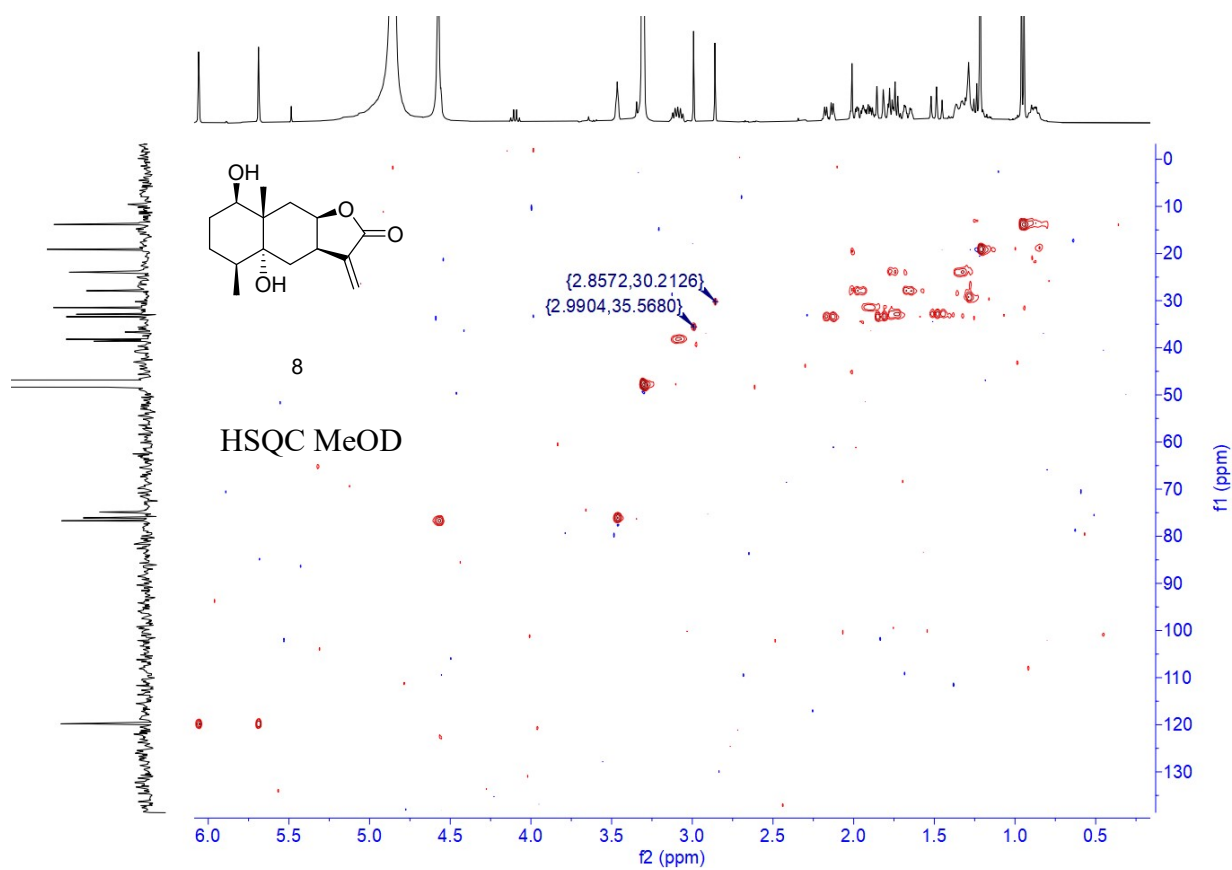

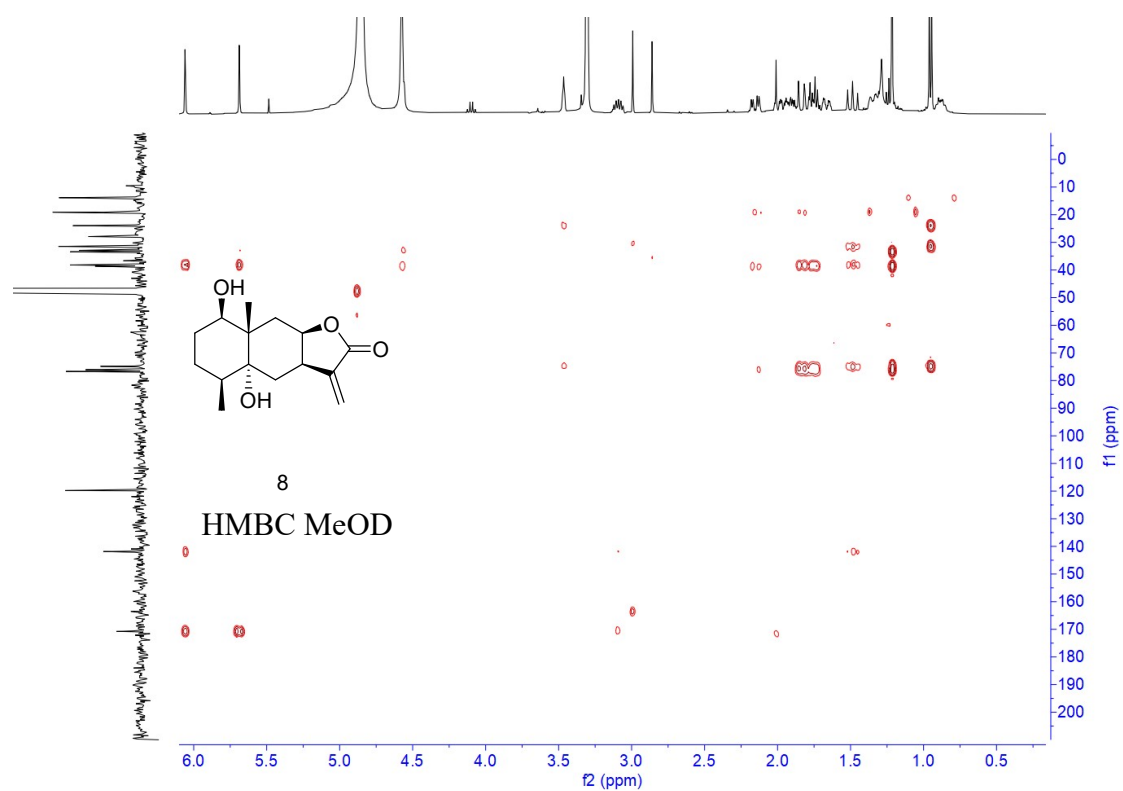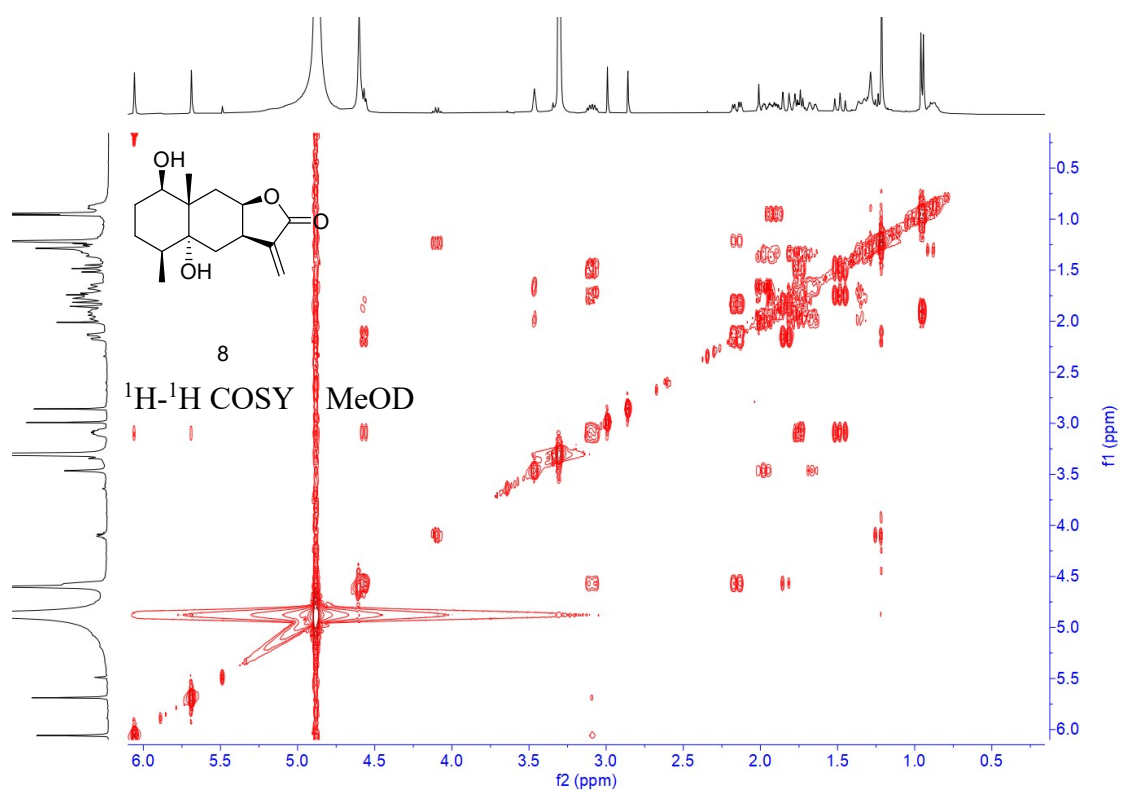

Supplement: s1 [file s1]
